# Supplementary material for: Pharmacokinetic recall study of Estonian Biobank participants carrying novel genetic variants in CYP2C19 and CYP2D6
Source: Research Square preprint supplement (doi:10.21203/rs.3.rs-7084648/v1), 2025-07-15
Supplement: Supplementary file 1 [file 5827189e6f51b784c6492557.xlsx]

## Sheet: Description
Overview and description of Supplementary Tables.
Supplementary Table 1.	Novel variants in CYP2C19 and CYP2D6 selected for recall invitations.
Supplementary Table 2.	Inclusion criteria for study invitations and participant recruitment summary.
Supplementary Table 3.	Star-allele calls for the 114 study participants: pre-recruitment and post-recruitment tools.
Supplementary Table 4.	Concordance of star-allele calls between different tools for CYP2C19 and CYP2D6.
Supplementary Table 5.	Linear regression results assessing the effects of CYP2C19 and CYP2D6 phenotypes on omeprazole and metoprolol metabolic ratios, respectively.
Supplementary Table 6.	All variants detected by long-read sequencing (n = 112) within the CYP2C19 gene (including the *17 regulatory variant).
Supplementary Table 7.	Linear regression results assessing CYP2C19 diplotype effects on omeprazole metabolic ratios
Supplementary Table 8.	All variants detected by long-read sequencing (n = 112) within the CYP2D6 gene
Supplementary Table 9.	Linear regression results assessing CYP2D6 diplotype effects on metoprolol metabolic ratios
Supplementary Table 10.	Presence of CYP2D6 and CYP2C19 inhibitors among study participants to assess the impact of drug–drug interactions.
Supplementary Table 11.	Genome-wide association results of log-transformed metabolic ratios of omeprazole and metoprolol

## Sheet: Supplementary T1
Supplementary Table 1. Novel variants in CYP2C19 and CYP2D6 selected for recall invitations. Variants were identified from short-read sequencing data and selected based on predicted loss-of-function or potentially deleterious effects.
Gene	CHR	POS	REF	ALT	CHR:POS hg19	CHR:POS hg38	Functionality Prediction ADME	N individuals sequencing data	MAF % (sequencing data)	Variant type	N participated
CYP2D6	22	42522916	CG	C	22:42522916	chr22:42126914	deleterious	2	0.04	LoF
CYP2D6	22	42522982	TGA	T	22:42522982	chr22:42126980	deleterious	6	0.10	LoF	2
CYP2D6	22	42523847	GCACATCCGGATGTAGGATC	G	22:42523847	chr22:42127845	deleterious	1	0.02	LoF
CYP2D6	22	42523889	G	T	22:42523889	chr22:42127887	deleterious	1	0.02	Missense	1
CYP2D6	22	42523916	C	T	22:42523916	chr22:42127914	deleterious	1	0.02	Missense
CYP2D6	22	42523928	C	T	22:42523928	chr22:42127926	deleterious	1	0.02	Missense
CYP2D6	22	42525143	G	A	22:42525143	chr22:42129141	deleterious	1	0.02	Missense
CYP2C19	10	96535156	T	G	10:96535156	chr10:94775399	deleterious	1	0.02	Missense
CYP2C19	10	96540264	T	G	10:96540264	chr10:94780507	deleterious	1	0.02	Missense
CYP2C19	10	96540331	G	A	10:96540331	chr10:94780574	deleterious	2	0.04	Missense
CYP2C19	10	96541688	C	G	10:96541688	chr10:94781931	deleterious	1	0.02	Missense
CYP2C19	10	96580257	A	T	10:96580257	chr10:94820500	deleterious	1	0.02	Missense
CYP2C19	10	96580323	C	T	10:96580323	chr10:94820566	deleterious	1	0.02	Missense
CYP2C19	10	96602648	T	C	10:96602648	chr10:94842891	deleterious	1	0.02	Missense

## Sheet: Supplementary T2
Supplementary Table 2. Inclusion criteria for study invitations and participant recruitment summary. This table outlines the genetic inclusion categories, the number of individuals selected for invitation, and the number who ultimately participated in the study.
Inclusion reason	Invited	Participated
CYP2C19 deletion	422	61
CYP2C19 homozygous deletion	11	2
CYP2D6 deletion	22	5
CYP2C19 & CYP2D6 deletion	9	4
Novel Loss of function variant	9	2
Novel missense variant	12	1
Wild type	90	14
CYP2D6 *4	21	7
CYP2C19 *2	19	9
CYP2C19 *17	22	9
Total	637	114

## Sheet: Supplementary T3
Supplementary Table 3. Star-allele calls for the 114 study participants: pre-recruitment and post-recruitment tools. This table presents the star-allele diplotypes identified for all participants before recruitment, along with the tools used for post-recruitment comparison. PacBio StarPhase (pb-StarPhase) calls are considered the gold standard, and the phenotypes shown are based on these diplotyp…
Recruitment			Post-recruitment
ID	UT-tool_CYP2D6	UT-tool_CYP2C19	Cyrius	Aldy	pbStarPhase_CYP2D6	Activity.Score_CYP2D6	Phenotype_CYP2D6	WT_diplotype_CYP2D6	CYP2C19_PharmCAT	pbStarPhase_CYP2C19	Activity.Score_CYP2C19	Phenotype_CYP2C19	WT_diplotype_CYP2C19
ID1	*1/*1	*1/*1			*1/*1	2.0	Normal Metabolizer	WT/WT	*1/*1	*1/*1	n/a	Normal Metabolizer	WT/WT
ID2	*1/*9	*1/*1			*1/*9	1.25	Normal Metabolizer	WT/*9	*1/*1	*1/*1	n/a	Normal Metabolizer	WT/WT
ID3	*1/*4	*1/*1			*1/*4	1.0	Intermediate Metabolizer	WT/*4	*1/*1	*1/*1	n/a	Normal Metabolizer	WT/WT
ID4	*1/*35	*1/*17			*1/*35	2.0	Normal Metabolizer	WT/WT	*1/*17	*1/*17	n/a	Rapid Metabolizer	WT/*17
ID5	*1/*2	*1/*1	*1/*2	*1/*2	*1/*2	2.0	Normal Metabolizer	WT/WT	*1/*38	*1/*38	n/a	Normal Metabolizer	WT/WT
ID6	*2/*2	*1/*17			*2/*2	2.0	Normal Metabolizer	WT/WT	*17/*38	*17/*38	n/a	Rapid Metabolizer	WT/*17
ID7	*1/*1	*1/*1	*1/*1	*1/*1	*1/*1	2.0	Normal Metabolizer	WT/WT	*1/*1	*1/*1	n/a	Normal Metabolizer	WT/WT
ID8	*4/*4	*1/*1	*4/*4	*4/*4	*4/*4	0.0	Poor Metabolizer	*4/*4	*1/*1	*1/*1	n/a	Normal Metabolizer	WT/WT
ID9	*4/*4	*1/*1	*4/*68+*4	*4/*4	*4/[*68 + *4]	0.0	Poor Metabolizer	*4/[*68 + *4]	*1/*1	*1/*1	n/a	Normal Metabolizer	WT/WT
ID10	*1/*2	*1/*1	*1/*2	*2/*124	*2/*124	1.0	Intermediate Metabolizer	WT/*124	*1/*1	*1/*1	n/a	Normal Metabolizer	WT/WT
ID11	*1/*1	*1/*1	*1/*1	*1/*1	*1/*1	2.0	Normal Metabolizer	WT/WT	*1/*1	*1/*1	n/a	Normal Metabolizer	WT/WT
ID12	*1/*1	*1/*1	*1/*1	*1/*1	*1/*1	2.0	Normal Metabolizer	WT/WT	*1/*1	*1/*1	n/a	Normal Metabolizer	WT/WT
ID13	*1/*1	*1/*1	*1/*1	*1/*1	*1/*1	2.0	Normal Metabolizer	WT/WT	*1/*1	*1/*1	n/a	Normal Metabolizer	WT/WT
ID14	*1/*1	*1/*1	*1/*1	*1/*1	*1/*1	2.0	Normal Metabolizer	WT/WT	*1/*1	*1/*1	n/a	Normal Metabolizer	WT/WT
ID15	*4/*4	*1/*1	*68+*4/*68+*4	*4/*68+*4	*4/[*68 + *4]	0.0	Poor Metabolizer	*4/[*68 + *4]	*1/*1	*1/*1	n/a	Normal Metabolizer	WT/WT
ID16	*1/*41	*1/*1			*41/*124	0.25	Intermediate Metabolizer	*41/*124	*1/*1	*1/*1	n/a	Normal Metabolizer	WT/WT
ID17	*1/*1	*1/*1	*1/*1	*1/*1	*1/*1	2.0	Normal Metabolizer	WT/WT	*1/*1	*1/*1	n/a	Normal Metabolizer	WT/WT
ID18	*4/*4	*1/*1	*4/*4	*4/*4	*4/*4	0.0	Poor Metabolizer	*4/*4	*1/*1	*1/*1	n/a	Normal Metabolizer	WT/WT
ID19	*1/*1	*1/*17	*1/*1	*1/*1	*1/*1	2.0	Normal Metabolizer	WT/WT	*1/*17	*1/*17	n/a	Rapid Metabolizer	WT/*17
ID20	*1/*1	*1/*1			*1/*1	2.0	Normal Metabolizer	WT/WT	*1/*17	*1/*17	n/a	Rapid Metabolizer	WT/*17
ID21	*1/*10	*1/*1			*1/[*68 + *4]	1.0	Intermediate Metabolizer	WT/[*68 + *4]	*1/*17	*1/*17	n/a	Rapid Metabolizer	WT/*17
ID22	*1/*35	*1/*1			*1/*35	2.0	Normal Metabolizer	WT/WT	*1/*17	*1/*17	n/a	Rapid Metabolizer	WT/*17
ID23	*1/*10	*1/*1			*1/[*68 + *4]	1.0	Intermediate Metabolizer	WT/[*68 + *4]	*1/*17	*1/*17	n/a	Rapid Metabolizer	WT/*17
ID24	*1/*33	*1/*1			*1/*33	2.0	Normal Metabolizer	WT/WT	*1/*17	*1/*17	n/a	Rapid Metabolizer	WT/*17
ID25	*1/*4	*1/*2	*1/*4	*1/*4	*1/*4	1.0	Intermediate Metabolizer	WT/*4	*1/*2	*1/*2	n/a	Intermediate Metabolizer	WT/*2
ID26	*1/*5	*1/*2			*1/*5	1.0	Intermediate Metabolizer	WT/*5	*1/*2	*1/*2	n/a	Intermediate Metabolizer	WT/*2
ID27	*1/*33	*1/*2			*1/*33	2.0	Normal Metabolizer	WT/WT	*1/*2	*1/*2	n/a	Intermediate Metabolizer	WT/*2
ID28	*1/*4	*1/*2			*1/*4	1.0	Intermediate Metabolizer	WT/*4	*1/*2	*1/*2	n/a	Intermediate Metabolizer	WT/*2
ID29	*1/*2	*1/*2	*1/*2	*1/*2	*1/*2	2.0	Normal Metabolizer	WT/WT	*1/*2	*1/*2	n/a	Intermediate Metabolizer	WT/*2
ID30	*1/*5	*1/*2	*1/*5	*1/*5	*1/*5	1.0	Intermediate Metabolizer	WT/*5	*1/*2	*1/*2	n/a	Intermediate Metabolizer	WT/*2
ID31	*1/*33	*1/*2	*1/*33	*1/*33	*1/*33	2.0	Normal Metabolizer	WT/WT	*1/*2	*1/*2	n/a	Intermediate Metabolizer	WT/*2
ID32	*5/*35	*1/*2	*5/*35	*5/*35	*5/*35	1.0	Intermediate Metabolizer	WT/*5	*1/*2	*1/*2	n/a	Intermediate Metabolizer	WT/*2
ID33	*4/*4	*1/*1			[*68 + *4]/[*68 + *4]	0.0	Poor Metabolizer	[*68 + *4]/[*68 + *4]	*1/*1	*1/*37	n/a	Intermediate Metabolizer	WT/*37
ID34	*2/*4	*1/*1			*2/[*68 + *4]	1.0	Intermediate Metabolizer	WT/[*68 + *4]	*1/*1	*1/*37	n/a	Intermediate Metabolizer	WT/*37
ID35	*1/*1	*1/*1	*1/*1	*1/*1	*1/*1	2.0	Normal Metabolizer	WT/WT	*1/*1	*1/*37	n/a	Intermediate Metabolizer	WT/*37
ID36	*1/*1	*1/*1			*1/[*68 + *4]	1.0	Intermediate Metabolizer	WT/[*68 + *4]	*1/*1	*1/*37	n/a	Intermediate Metabolizer	WT/*37
ID37	*1/*35	*1/*1			*1/*35	2.0	Normal Metabolizer	WT/WT	*1/*1	*1/*37	n/a	Intermediate Metabolizer	WT/*37
ID38	*1/*3	*1/*1	*1/*3	*1/*3	*1/*3	1.0	Intermediate Metabolizer	WT/*3	*1/*1	*1/*37	n/a	Intermediate Metabolizer	WT/*37
ID39	*1/*33	*1/*1			*1/*33	2.0	Normal Metabolizer	WT/WT	NA_MISS	*1/*37	n/a	Intermediate Metabolizer	WT/*37
ID40	*1/*1	*1/*1			*1/*1	2.0	Normal Metabolizer	WT/WT	*1/*1	*1/*37	n/a	Intermediate Metabolizer	WT/*37
ID41	*1/*35	*1/*1			*1/*1	2.0	Normal Metabolizer	WT/WT	*1/*1	*1/*37	n/a	Intermediate Metabolizer	WT/*37
ID42	*2/*35	*1/*1			*2/*35	2.0	Normal Metabolizer	WT/WT	*1/*1	*1/*37	n/a	Intermediate Metabolizer	WT/*37
ID43	*1/*35	*1/*2			*1/*35	2.0	Normal Metabolizer	WT/WT	*1/*1	*1/*37	n/a	Intermediate Metabolizer	WT/*37
ID44	*1/*2	*1/*1			*1/*2	2.0	Normal Metabolizer	WT/WT	*1/*1	*1/*37	n/a	Intermediate Metabolizer	WT/*37
ID45	*1/*4	*1/*1			*1/*4	1.0	Intermediate Metabolizer	WT/*4	*1/*1	*1/*37	n/a	Intermediate Metabolizer	WT/*37
ID46	*1/*2	*1/*1			*1/*2	2.0	Normal Metabolizer	WT/WT	*1/*1	*1/*37	n/a	Intermediate Metabolizer	WT/*37
ID47	*1/*4	*1/*1			*1/*4	1.0	Intermediate Metabolizer	WT/*4	*1/*38	*1/*37	n/a	Intermediate Metabolizer	WT/*37
ID48	*1/*1	*1/*1	*1/*1	*1/*1	*1/*1	2.0	Normal Metabolizer	WT/WT	*1/*1	*1/*37	n/a	Intermediate Metabolizer	WT/*37
ID49	*1/*2	*1/*1			*1/*2	2.0	Normal Metabolizer	WT/WT	*1/*1	*1/*37	n/a	Intermediate Metabolizer	WT/*37
ID50	*1/*4	*1/*1			*1/*1	2.0	Normal Metabolizer	WT/WT	*1/*1	*1/*37	n/a	Intermediate Metabolizer	WT/*37
ID51	*1/*35	*1/*2			*1/*35	2.0	Normal Metabolizer	WT/WT	*1/*1	*1/*37	n/a	Intermediate Metabolizer	WT/*37
ID52	*2/*3	*1/*1			*2/*3	1.0	Intermediate Metabolizer	WT/*3	*1/*38	*1/*37	n/a	Intermediate Metabolizer	WT/*37
ID53	*1/*4	*1/*1			*1/*4	1.0	Intermediate Metabolizer	WT/*4	*1/*1	*1/*37	n/a	Intermediate Metabolizer	WT/*37
ID54	*1/*9	*1/*1			*1/*9	1.25	Normal Metabolizer	WT/*9	*1/*1	*1/*37	n/a	Intermediate Metabolizer	WT/*37
ID55	*1/*5	*1/*1			*1/*5	1.0	Intermediate Metabolizer	WT/*5	*1/*1	*1/*37	n/a	Intermediate Metabolizer	WT/*37
ID56	*2/*35	*1/*1			*2/*35	2.0	Normal Metabolizer	WT/WT	*1/*1	*1/*37	n/a	Intermediate Metabolizer	WT/*37
ID57	*1/*35	*1/*1			*1/*35	2.0	Normal Metabolizer	WT/WT	*1/*1	*1/*37	n/a	Intermediate Metabolizer	WT/*37
ID58	*2/*2	*1/*1			*2/*2	2.0	Normal Metabolizer	WT/WT	*1/*1	*1/*37	n/a	Intermediate Metabolizer	WT/*37
ID59	*4/*35	*1/*1			*4/*35	1.0	Intermediate Metabolizer	WT/*4	*1/*1	*1/*37	n/a	Intermediate Metabolizer	WT/*37
ID60	*1/*1	*1/*1			*1/*5	1.0	Intermediate Metabolizer	WT/*5	*1/*1	*1/*37	n/a	Intermediate Metabolizer	WT/*37
ID61	*1/*41	*1/*1	*1/*41	*2/*119	*1/*41	1.25	Normal Metabolizer	WT/*41	*1/*1	*1/*37	n/a	Intermediate Metabolizer	WT/*37
ID62	*1/*5	*1/*1			*1/*5	1.0	Intermediate Metabolizer	WT/*5	NA_MISS	*1/*37	n/a	Intermediate Metabolizer	WT/*37
ID63	*4/*35	*1/*1	*35/*68+*4	*4/*5	*35/[*68 + *4]	1.0	Intermediate Metabolizer	WT/[*68 + *4]	*1/*1	*1/*37	n/a	Intermediate Metabolizer	WT/*37
ID64	*4/*35	*1/*1	*4/*35	*4/*35	*4/*35	1.0	Intermediate Metabolizer	WT/*4	*1/*1	*1/*37	n/a	Intermediate Metabolizer	WT/*37
ID65	*4/*33	*1/*1			*4/*33	1.0	Intermediate Metabolizer	WT/*4	*1/*1	*1/*37	n/a	Intermediate Metabolizer	WT/*37
ID66	*1/*4	*1/*1			*1/*4	1.0	Intermediate Metabolizer	WT/*4	*1/*1	*1/*37	n/a	Intermediate Metabolizer	WT/*37
ID67	*2/*33	*1/*1			*2/*33	2.0	Normal Metabolizer	WT/WT	*1/*1	*1/*37	n/a	Intermediate Metabolizer	WT/*37
ID68	*2/*33	*1/*1			*2/*33	2.0	Normal Metabolizer	WT/WT	*1/*1	*1/*37	n/a	Intermediate Metabolizer	WT/*37
ID69	*35/*41	*1/*1			*35/*41	1.25	Normal Metabolizer	WT/*41	*1/*1	*1/*37	n/a	Intermediate Metabolizer	WT/*37
ID70	*2/*5	*1/*1			*2/*5	1.0	Intermediate Metabolizer	WT/*5	*1/*1	*1/*37	n/a	Intermediate Metabolizer	WT/*37
ID71	*4/*5	*1/*1	*5/*68+*4	*4/*68	*5/[*68 + *4]	0.0	Poor Metabolizer	*5/[*68 + *4]	*1/*1	*1/*37	n/a	Intermediate Metabolizer	WT/*37
ID72	*4/*35	*1/*1			*4/*35	1.0	Intermediate Metabolizer	WT/*4	*1/*1	*1/*37	n/a	Intermediate Metabolizer	WT/*37
ID73	*1/*1	*1/*1	*1/*1	*1/*1	*1/*1	2.0	Normal Metabolizer	WT/WT	*1/*38	*1/*38	n/a	Normal Metabolizer	WT/WT
ID74	*1/*1	*1/*1	*1/*1	*1/*1	*1/*1	2.0	Normal Metabolizer	WT/WT	*1/*38	*1/*38	n/a	Normal Metabolizer	WT/WT
ID75	*1/*1	*1/*1	*1/*1	*1/*1	*1/*1	2.0	Normal Metabolizer	WT/WT	*1/*38	*1/*38	n/a	Normal Metabolizer	WT/WT
ID76	*1/*1	*1/*1	*1/*1	*1/*1	*1/*1	2.0	Normal Metabolizer	WT/WT	*1/*38	*1/*38	n/a	Normal Metabolizer	WT/WT
ID77	*2/*5	*1/*1	*2/*5	*2/*5	*2/*5	1.0	Intermediate Metabolizer	WT/*5	*1/*38	*1/*38	n/a	Normal Metabolizer	WT/WT
ID78	*1/*1	*1/*1			*1/*1	2.0	Normal Metabolizer	WT/WT	*1/*38	*1/*38	n/a	Normal Metabolizer	WT/WT
ID79	*1/*1	*17/*17	*1/*1	*1/*1	*1/*1	2.0	Normal Metabolizer	WT/WT	*17/*17	*17/*17	n/a	Ultrarapid Metabolizer	*17/*17
ID80	*1/*1	*17/*17	*1/*1	*1/*1	*1/*1	2.0	Normal Metabolizer	WT/WT	*17/*17	*17/*17	n/a	Ultrarapid Metabolizer	*17/*17
ID81	*1/*1	*17/*17	*1/*1	*1/*1	*1/*1	2.0	Normal Metabolizer	WT/WT	*17/*17	*17/*17	n/a	Ultrarapid Metabolizer	*17/*17
ID82	*1/*4	*17/*17	*1/*68+*4	*1/*68+*4	*1/[*68 + *4]	1.0	Intermediate Metabolizer	WT/[*68 + *4]	*17/*17	*17/*37	n/a	Intermediate Metabolizer	*17/*37
ID83	*1/*4	*17/*17			*1/*4	1.0	Intermediate Metabolizer	WT/*4	*17/*17	*17/*37	n/a	Intermediate Metabolizer	*17/*37
ID84	*4/*35	*17/*17			*35/*68x3		Intermediate Metabolizer	WT/*68x3	NA_MISS	*17/*37	n/a	Intermediate Metabolizer	*17/*37
ID85	*1/*4	*17/*17			*1/[*68 + *4]	1.0	Intermediate Metabolizer	WT/[*68 + *4]	*17/*17	*17/*37	n/a	Intermediate Metabolizer	*17/*37
ID86	*2/*4	*17/*17			*2x2/*4	2.0	Normal Metabolizer	*2x2/*4	*17/*17	*17/*37	n/a	Intermediate Metabolizer	*17/*37
ID87	*1/*2	*17/*17			*1/*2	2.0	Normal Metabolizer	WT/WT	*17/*17	*17/*37	n/a	Intermediate Metabolizer	*17/*37
ID88	*4/*4	*1/*17	./.	*4/*68+*4	*4/[*68 + *4]	0.0	Poor Metabolizer	*4/[*68 + *4]	*17/*17	*17/*37	n/a	Intermediate Metabolizer	*17/*37
ID89	*1/*2	*17/*17			*1/*2	2.0	Normal Metabolizer	WT/WT	*17/*17	*17/*37	n/a	Intermediate Metabolizer	*17/*37
ID90	*1/*1	*17/*17			*1/*1	2.0	Normal Metabolizer	WT/WT	*17/*17	*17/*37	n/a	Intermediate Metabolizer	*17/*37
ID91	*4/*35	*17/*17	*4/*35	*4/*35	*4/*35	1.0	Intermediate Metabolizer	WT/*4	*17/*17	*17/*37	n/a	Intermediate Metabolizer	*17/*37
ID92	*1/*1	*17/*17			*1/*1	2.0	Normal Metabolizer	WT/WT	*17/*17	*17/*37	n/a	Intermediate Metabolizer	*17/*37
ID93	*1/*4	*17/*17			*1/*4	1.0	Intermediate Metabolizer	WT/*4	NA_MISS	*17/*37	n/a	Intermediate Metabolizer	*17/*37
ID94	*2/*2	*17/*17			*2/[*13 + *2]	2.0	Normal Metabolizer	WT/[*13 + *2]	*17/*17	*17/*37	n/a	Intermediate Metabolizer	*17/*37
ID95	*1/*35	*17/*17			*1/*35	2.0	Normal Metabolizer	WT/WT	*17/*17	*17/*37	n/a	Intermediate Metabolizer	*17/*37
ID96	*1/*1	*17/*17			*1/*1	2.0	Normal Metabolizer	WT/WT	*17/*17	*17/*37	n/a	Intermediate Metabolizer	*17/*37
ID97	*1/*5	*1/*17	*1/*5	*1/*5	*1/*5	1.0	Intermediate Metabolizer	WT/*5	*17/*38	*17/*38	n/a	Rapid Metabolizer	WT/*17
ID98	*1/*41	*1/*1			*41/*124	0.25	Intermediate Metabolizer	*41/*124	*17/*38	*17/*38	n/a	Rapid Metabolizer	WT/*17
ID99	*1/*1	*2/*2	*1/*1	*1/*1	*1/*1	2.0	Normal Metabolizer	WT/WT	*2/*2	*2/*2	n/a	Poor Metabolizer	*2/*2
ID100	*2/*2	*2/*2	*2/*2	*2/*2	*2/*2	2.0	Normal Metabolizer	WT/WT	*2/*2	*2/*2	n/a	Poor Metabolizer	*2/*2
ID101	*1/*2	*2/*2	*1/*2	*1/*2	*1/*2	2.0	Normal Metabolizer	WT/WT	*2/*2	*2/*2	n/a	Poor Metabolizer	*2/*2
ID102	*1/*2	*2/*2	*1/*2	*1/*2	*1/*2	2.0	Normal Metabolizer	WT/WT	*2/*2	*2/*2	n/a	Poor Metabolizer	*2/*2
ID103	*1/*5	*2/*2			*1/*5	1.0	Intermediate Metabolizer	WT/*5	NA_MISS	*2/*37	n/a	Poor Metabolizer	*2/*37
ID104	*35/*35	*1/*2	*35/*35	*35/*35	*35/*35	2.0	Normal Metabolizer	WT/WT	*2/*2	*2/*37	n/a	Poor Metabolizer	*2/*37
ID105	*3/*35	*2/*2			*3/*35	1.0	Intermediate Metabolizer	WT/*3	NA_MISS	*2/*37	n/a	Poor Metabolizer	*2/*37
ID106	*1/*41	*1/*1			*1/*41	1.25	Normal Metabolizer	WT/*41	NA_MISS	*2/*37	n/a	Poor Metabolizer	*2/*37
ID107	*1/*4	*2/*2			*1/[*68 + *4]	1.0	Intermediate Metabolizer	WT/[*68 + *4]	NA_MISS	*2/*37	n/a	Poor Metabolizer	*2/*37
ID108	*1/*4	*2/*2			*1/*4	1.0	Intermediate Metabolizer	WT/*4	*2/*2	*2/*37	n/a	Poor Metabolizer	*2/*37
ID109	*9/*35	*2/*2	*9/*35	*9/*35	*9/*35	1.25	Normal Metabolizer	WT/*9	*2/*2	*2/*37	n/a	Poor Metabolizer	*2/*37
ID110	*2/*4	*2/*2			*2x2/*4	2.0	Normal Metabolizer	*2x2/*4	NA_MISS	*2/*37	n/a	Poor Metabolizer	*2/*37
ID111	*1/*35	*1/*1			*1/*35	2.0	Normal Metabolizer	WT/WT	NA_MISS	*2/*37	n/a	Poor Metabolizer	*2/*37
ID112	*4/*4	*1/*1			*4/*4	0.0	Poor Metabolizer	*4/*4	NA_MISS	*2/*37	n/a	Poor Metabolizer	*2/*37
ID113	*1/*1	*1/*2			*1/*1	2.0	Normal Metabolizer	WT/WT	*1/*2	*37/*37	n/a	Poor Metabolizer	*37/*37
ID114	*1/*2	*1/*2			*1/*2	2.0	Normal Metabolizer	WT/WT	*10/*17	*37/*37	n/a	Poor Metabolizer	*37/*37
no long-read sequencing

## Sheet: Supplementary T4
Supplementary Table 4. Concordance of star-allele calls between different tools for CYP2C19 and CYP2D6. This table summarizes the agreement and discrepancies in diplotype calls between multiple computational tools used in the study.
CYP2D6						CYP2C19
Diplotype	Aldy	Cyrius	pb-StarPhase	UT-Tool		Diplotype	pb-StarPhase	PharmCAT	UT-Tool
*1/*1	17	17	17	17		*1/*1	15	51	69
*1/*2	4	5	4	5		*1/*17	7	7	5
*1/*3	1	1	1	1		*1/*2	8	9	13
*1/*33	1	1	1	1		*1/*37	40	0	0
*1/*4	1	1	1	2		*1/*38	7	9	0
*1/*5	2	2	2	2		*17/*17	3	16	17
*1/[*68 + *4]	1	1	1	0		*17/*37	15	0	0
*2/*119	1	0	0	0		*17/*38	3	3	0
*2/*124	1	0	1	0		*2/*2	4	7	10
*2/*2	1	1	1	1		*2/*37	10	0	0
*2/*5	1	1	1	1		*37/*37	2	0	0
*35/*35	1	1	1	1		*10/*17	0	1	0
*4/*35	2	2	2	3		NA_MISS	0	11	0
*4/*4	3	2	2	5
*4/*5	1	0	0	1
*4/*68	1	0	0	0
*4/[*68 + *4]	2	1	3	0
*5/*35	1	1	1	1
*9/*35	1	1	1	1
*1/*41	0	1	1	1
*35/[*68 + *4]	0	1	1	0
*5/[*68 + *4]	0	1	1	0
./.	0	1	0	0
[*68 + *4]/[*68 + *4]	0	1	0	0

## Sheet: Supplementary T5
Supplementary Table 5. Linear regression results assessing the effects of CYP2C19 and CYP2D6 phenotypes on omeprazole and metoprolol metabolic ratios, respectively. Models for CYP2C19 were adjusted for body mass index (BMI) and CYP2C19 inhibitor use. CYP2D6 models were adjusted for CYP2D6 inhibitor use only. For CYP2D6, results are presented both by phenotype category and by activity score.
CYP2C19							CYP2D6
CYP2C19 phenotype model (n=113)	Estimate	Standar error	P-value	CI 2.5 %	CI 97.5 %		Phenotype model (n=113)	Estimate	Standar error	P-value	CI 2.5 %	CI 97.5 %
CYP2C19 inhibitors	1.11984	0.229157	3.65632e-06	0.670699	1.56898		CYP2D6 inhibitors	0.768554	0.207251	0.000329951	0.36235	1.17476
BMI	0.0316261	0.0111869	0.00561674	0.00970023	0.053552		Poor metabolizer	6.4304	0.27784	7.12853e-44	5.88585	6.97496
Poor metabolizer	2.58793	0.195617	3.52151e-24	2.20452	2.97133		Intermediate metabolizer	0.951869	0.150287	5.49587e-09	0.657312	1.24643
Intermediade metabolizer	0.394029	0.147639	0.00880731	0.104662	0.683397
Rapid metabolizer	-0.733836	0.234171	0.00223232	-1.1928	-0.27487
Ultrarapid metabolizer	-0.348602	0.366089	0.343145	-1.06612	0.368919
Contrast analysis	P-value
RM vs UM	0.3347
CYP2C19 phenotype RM+UM model (n=113)	Estimate	Standar error	P-value	CI 2.5 %	CI 97.5 %		Activity score model (n=113)	Estimate	Standar error	P-value	CI 2.5 %	CI 97.5 %
CYP2C19 inhibitors	1.08255	0.225838	5.31784e-06	0.63991	1.52518		CYP2D6 inhibitors	0.66049	0.177321	0.000313919	0.312946	1.00803
BMI	0.0319935	0.0111773	0.00505948	0.0100864	0.0539005		Activity Score 0.0	6.57758	0.237092	1.10785e-50	6.11289	7.04227
Rapid+Ultrarapid metabolizer	-0.637741	0.21208	0.00328777	-1.05341	-0.222072		Activity Score 0.25	2.68452	0.451673	3.53937e-08	1.79926	3.56978
Intermediate metabolizer	0.394639	0.147596	0.00867604	0.105357	0.683921		Activity Score 1.0	0.993628	0.131496	1.48691e-11	0.735901	1.25136
Poor metabolizer	2.58614	0.195553	3.01919e-24	2.20286	2.96942		Activity Score 1.25	1.50186	0.271015	2.17087e-07	0.970679	2.03304

## Sheet: Supplementary T6
Supplementary Table 6. All variants detected by long-read sequencing (n = 112) within the CYP2C19 gene (including the *17 regulatory variant). This comprehensive variant list includes all variants within CYP1C19 gene region (chr10:94,762,681–94,855,547) detected from long-read sequencing.
Variant ID	Nr individuals	Distinct star alleles present in carriers of this variant	rsID	Consequence	Impact	Novel	PharmVar rsID	PharmVar Star Alleles
chr10_94808278_A_T	112	*17/*37;*2/*37;*1/*37;*1/*17;*17/*38;*1/*2;*1/*1;*2/*2;*1/*38;*17/*17;*37/*37	rs11188082	intron_variant	MODIFIER
chr10_94817647_T_C	112	*17/*37;*2/*37;*1/*37;*1/*17;*17/*38;*1/*2;*1/*1;*2/*2;*1/*38;*17/*17;*37/*37	rs61886228	intron_variant	MODIFIER
chr10_94817752_A_G	112	*17/*37;*2/*37;*1/*37;*1/*17;*17/*38;*1/*2;*1/*1;*2/*2;*1/*38;*17/*17;*37/*37	rs61886229	intron_variant	MODIFIER
chr10_94822035_G_T	112	*17/*37;*2/*37;*1/*37;*1/*17;*17/*38;*1/*2;*1/*1;*2/*2;*1/*38;*17/*17;*37/*37	rs10748625	intron_variant	MODIFIER
chr10_94823871_T_C	112	*17/*37;*2/*37;*1/*37;*1/*17;*17/*38;*1/*2;*1/*1;*2/*2;*1/*38;*17/*17;*37/*37	rs1853209	intron_variant	MODIFIER
chr10_94827874_T_C	112	*17/*37;*2/*37;*1/*37;*1/*17;*17/*38;*1/*2;*1/*1;*2/*2;*1/*38;*17/*17;*37/*37	rs9664553	intron_variant	MODIFIER
chr10_94836209_C_T	112	*17/*37;*2/*37;*1/*37;*1/*17;*17/*38;*1/*2;*1/*1;*2/*2;*1/*38;*17/*17;*37/*37	rs2093435	intron_variant	MODIFIER
chr10_94841819_C_T	112	*17/*37;*2/*37;*1/*37;*1/*17;*17/*38;*1/*2;*1/*1;*2/*2;*1/*38;*17/*17;*37/*37	rs10748628	intron_variant	MODIFIER
chr10_94842866_A_G	112	*17/*37;*2/*37;*1/*37;*1/*17;*17/*38;*1/*2;*1/*1;*2/*2;*1/*38;*17/*17;*37/*37	rs3758581,CM983294	missense_variant	MODERATE		rs3758581	CYP2C19*1;CYP2C19*1.002;CYP2C19*1.003;CYP2C19*1.004;CYP2C19*1.005;CYP2C19*1.006;CYP2C19*1.007;CYP2C19*1.008;CYP2C19*1.009;CYP2C19*1.010;CYP2C19*2;CYP2C19*2.001;CYP2C19*2.002;CYP2C19*2.003;CYP2C19*2.004;CYP2C19*2.005;CYP2C19*2.006;CYP2C19*2.007;CYP2C19*2.008;CYP2C19*2.009;CYP2C19*2.010;CYP2C19*2.011;CYP2C19*2.012;CYP2C19*3;CYP2C19*3.001;CYP2C19*3.002;CYP2C19*3.003;CYP2C19*3.004;CYP2C19*4;CYP2C19*4…
chr10_94850760_T_C	112	*17/*37;*2/*37;*1/*37;*1/*17;*17/*38;*1/*2;*1/*1;*2/*2;*1/*38;*17/*17;*37/*37	rs1972341	intron_variant	MODIFIER
chr10_94765779_G_A	110	*17/*37;*2/*37;*1/*37;*1/*17;*17/*38;*1/*2;*1/*1;*2/*2;*1/*38;*17/*17	rs11188075	intron_variant	MODIFIER
chr10_94767381_A_C	110	*17/*37;*2/*37;*1/*37;*1/*17;*17/*38;*1/*2;*1/*1;*2/*2;*1/*38;*17/*17	rs4396216	intron_variant	MODIFIER
chr10_94770155_A_G	110	*17/*37;*2/*37;*1/*37;*1/*17;*17/*38;*1/*2;*1/*1;*2/*2;*1/*38;*17/*17	rs10082434	intron_variant	MODIFIER
chr10_94784235_C_CT	110	*17/*37;*2/*37;*1/*37;*1/*17;*17/*38;*1/*2;*1/*1;*2/*2;*1/*38;*17/*17	rs55734964	intron_variant	MODIFIER
chr10_94794659_A_G	110	*17/*37;*2/*37;*1/*37;*1/*17;*17/*38;*1/*2;*1/*1;*2/*2;*1/*38;*17/*17	rs9664368	intron_variant	MODIFIER
chr10_94797351_T_C	110	*17/*37;*2/*37;*1/*37;*1/*17;*17/*38;*1/*2;*1/*1;*2/*2;*1/*38;*17/*17	rs9783199,COSV64909615	intron_variant	MODIFIER
chr10_94762804_C_T	108	*17/*37;*2/*37;*1/*37;*1/*17;*17/*38;*1/*2;*1/*1;*2/*2;*1/*38;*17/*17	rs17885098	synonymous_variant	LOW		rs17885098	CYP2C19*1.002;CYP2C19*1.006;CYP2C19*1.008;CYP2C19*1.009;CYP2C19*1.010;CYP2C19*2.001;CYP2C19*2.002;CYP2C19*2.003;CYP2C19*2.004;CYP2C19*2.005;CYP2C19*2.006;CYP2C19*2.007;CYP2C19*2.008;CYP2C19*2.009;CYP2C19*2.010;CYP2C19*2.011;CYP2C19*2.012;CYP2C19*4.001;CYP2C19*4.002;CYP2C19*5.002;CYP2C19*6.001;CYP2C19*9.001;CYP2C19*9.002;CYP2C19*10.001;CYP2C19*11.001;CYP2C19*12.001;CYP2C19*14.001;CYP2C19*17.001;CY…
chr10_94853547_C_CT	102	*17/*37;*2/*37;*1/*37;*1/*17;*1/*2;*1/*1;*17/*38;*1/*38;*17/*17;*37/*37	rs34415420	3_prime_UTR_variant	MODIFIER
chr10_94809732_A_T	101	*17/*37;*2/*37;*1/*37;*1/*17;*1/*2;*1/*1;*1/*38;*37/*37	rs2224566	intron_variant	MODIFIER
chr10_94817028_G_A	101	*17/*37;*2/*37;*1/*37;*1/*17;*1/*2;*1/*1;*1/*38;*37/*37	rs11188085	intron_variant	MODIFIER
chr10_94819853_C_G	101	*17/*37;*2/*37;*1/*37;*1/*17;*1/*2;*1/*1;*1/*38;*37/*37	rs200878867	intron_variant	MODIFIER
chr10_94827532_G_A	101	*17/*37;*2/*37;*1/*37;*1/*17;*1/*2;*1/*1;*1/*38;*37/*37	rs11188087	intron_variant	MODIFIER
chr10_94834933_G_A	101	*17/*37;*2/*37;*1/*37;*1/*17;*1/*2;*1/*1;*1/*38;*37/*37	rs11188091,COSV64907595	intron_variant	MODIFIER
chr10_94849811_T_C	101	*17/*37;*2/*37;*1/*37;*1/*17;*1/*2;*1/*1;*1/*38;*37/*37	rs4917623	intron_variant	MODIFIER
chr10_94851443_CAAATAAATAAAT_C	97	*17/*37;*2/*37;*1/*37;*1/*17;*17/*38;*1/*1;*1/*38;*1/*2;*37/*37	rs71031598	intron_variant	MODIFIER
chr10_94804000_G_A	95	*17/*37;*2/*37;*1/*37;*1/*17;*1/*1;*1/*38;*1/*2;*37/*37	rs4494250	intron_variant	MODIFIER
chr10_94811786_A_G	95	*17/*37;*2/*37;*1/*37;*1/*17;*1/*1;*1/*38;*1/*2;*37/*37	rs2264938	intron_variant	MODIFIER
chr10_94821337_A_G	95	*17/*37;*2/*37;*1/*37;*1/*17;*1/*1;*1/*38;*1/*2;*37/*37	rs10786172	intron_variant	MODIFIER
chr10_94832387_A_G	94	*17/*37;*2/*37;*1/*37;*1/*17;*1/*1;*1/*38;*1/*2;*37/*37	rs11188090	intron_variant	MODIFIER
chr10_94840975_C_T	94	*17/*37;*2/*37;*1/*37;*1/*17;*1/*1;*1/*38;*1/*2;*37/*37	rs12416196	intron_variant	MODIFIER
chr10_94844454_C_CA	94	*17/*37;*2/*37;*1/*37;*1/*17;*1/*1;*1/*38;*1/*2;*37/*37	rs75164347	intron_variant	MODIFIER
chr10_94779551_T_TTTTTCTTTTC	88	*17/*37;*1/*37;*1/*17;*17/*38;*1/*2;*1/*1;*1/*38;*17/*17	rs6144036	intron_variant	MODIFIER
chr10_94842393_GT_G	87	*17/*37;*2/*37;*1/*37;*1/*17;*1/*2;*1/*1;*1/*38;*17/*17;*37/*37	rs57865512	intron_variant	MODIFIER
chr10_94811601_C_G	73	*17/*37;*2/*37;*1/*37;*1/*1;*1/*38;*1/*17;*37/*37	rs2757483	intron_variant	MODIFIER
chr10_94775986_A_G	70	*1/*37;*1/*17;*1/*2;*1/*1;*1/*38	rs4244284	intron_variant	MODIFIER
chr10_94766304_T_TTGTA	60	*17/*37;*2/*37;*1/*37;*1/*17;*17/*38;*1/*2;*2/*2;*1/*38;*17/*17	rs61477128	intron_variant	MODIFIER
chr10_94767965_C_G	60	*17/*37;*2/*37;*1/*37;*1/*17;*17/*38;*1/*2;*2/*2;*1/*38;*17/*17	rs11597292	intron_variant	MODIFIER
chr10_94772788_G_T	60	*17/*37;*2/*37;*1/*37;*1/*17;*17/*38;*1/*2;*2/*2;*1/*38;*17/*17	rs4291603	intron_variant	MODIFIER
chr10_94773293_A_T	60	*17/*37;*2/*37;*1/*37;*1/*17;*17/*38;*1/*2;*2/*2;*1/*38;*17/*17	rs4277036	intron_variant	MODIFIER
chr10_94774827_G_A	60	*17/*37;*2/*37;*1/*37;*1/*17;*17/*38;*1/*2;*2/*2;*1/*38;*17/*17	rs7916649	intron_variant	MODIFIER
chr10_94793025_A_C	60	*17/*37;*2/*37;*1/*37;*1/*17;*17/*38;*1/*2;*2/*2;*1/*38;*17/*17	rs12761391	intron_variant	MODIFIER
chr10_94794531_A_T	60	*17/*37;*2/*37;*1/*37;*1/*17;*17/*38;*1/*2;*2/*2;*1/*38;*17/*17	rs9664361	intron_variant	MODIFIER
chr10_94804815_G_T	60	*17/*37;*2/*37;*1/*37;*1/*17;*17/*38;*1/*2;*2/*2;*1/*38;*17/*17	rs2104161	intron_variant	MODIFIER
chr10_94813270_A_G	60	*17/*37;*2/*37;*1/*37;*1/*17;*17/*38;*1/*2;*2/*2;*1/*38;*17/*17	rs2264933	intron_variant	MODIFIER
chr10_94832711_G_GT	60	*17/*37;*2/*37;*1/*37;*1/*17;*1/*1;*37/*37	rs370709834	intron_variant	MODIFIER
chr10_94836408_T_A	60	*17/*37;*2/*37;*1/*37;*1/*17;*17/*38;*1/*2;*2/*2;*1/*38;*17/*17	rs10882498	intron_variant	MODIFIER
chr10_94839916_G_A	60	*17/*37;*2/*37;*1/*37;*1/*17;*17/*38;*1/*2;*2/*2;*1/*38;*17/*17	rs11498525	intron_variant	MODIFIER
chr10_94839932_C_A	60	*17/*37;*2/*37;*1/*37;*1/*17;*17/*38;*1/*2;*2/*2;*1/*38;*17/*17	rs11188093	intron_variant	MODIFIER
chr10_94845570_G_C	60	*17/*37;*2/*37;*1/*37;*1/*17;*17/*38;*1/*2;*2/*2;*1/*38;*17/*17	rs1555474	intron_variant	MODIFIER
chr10_94849307_G_A	60	*17/*37;*2/*37;*1/*37;*1/*17;*17/*38;*1/*2;*2/*2;*1/*38;*17/*17	rs1322181	intron_variant	MODIFIER
chr10_94852077_G_A	60	*17/*37;*2/*37;*1/*37;*1/*17;*17/*38;*1/*2;*2/*2;*1/*38;*17/*17	rs4617515	intron_variant	MODIFIER
chr10_94770747_A_G	54	*1/*17;*1/*37;*1/*1;*1/*38;*1/*2	rs4414147	intron_variant	MODIFIER
chr10_94818012_CAA_C	44	*2/*37;*1/*37;*1/*17;*17/*37;*1/*2;*2/*2;*1/*38;*17/*17;*17/*38	rs71031597	intron_variant	MODIFIER
chr10_94772850_T_C	34	*2/*37;*1/*37;*17/*38;*1/*2;*2/*2;*1/*38	rs4501922	intron_variant	MODIFIER
chr10_94777632_A_G	34	*2/*37;*1/*37;*17/*38;*1/*2;*2/*2;*1/*38	rs4362080	intron_variant	MODIFIER
chr10_94782837_C_T	34	*2/*37;*1/*37;*17/*38;*1/*2;*2/*2;*1/*38	rs67482845	intron_variant	MODIFIER
chr10_94788106_GTTCCA_G	34	*2/*37;*1/*37;*17/*38;*1/*2;*2/*2;*1/*38	rs61665511	intron_variant	MODIFIER
chr10_94810172_G_A	34	*2/*37;*1/*37;*17/*38;*1/*2;*2/*2;*1/*38	rs35476215	intron_variant	MODIFIER
chr10_94818012_CAA_CA	34	*2/*37;*1/*37;*1/*17;*17/*37;*1/*38;*2/*2;*1/*2	chr10_94818012_CAA_CA	intron_variant	MODIFIER	Novel
chr10_94828624_A_G	34	*2/*37;*1/*37;*17/*38;*1/*2;*2/*2;*1/*38	rs12573281	intron_variant	MODIFIER
chr10_94829819_G_A	34	*2/*37;*1/*37;*17/*38;*1/*2;*2/*2;*1/*38	rs112835152	intron_variant	MODIFIER
chr10_94839753_G_A	34	*2/*37;*1/*37;*17/*38;*1/*2;*2/*2;*1/*38	rs7915414	intron_variant	MODIFIER
chr10_94842037_A_G	34	*2/*37;*1/*37;*17/*38;*1/*2;*2/*2;*1/*38	rs66883721	intron_variant	MODIFIER
chr10_94818012_CA_C	30	*17/*37;*1/*37;*1/*1;*1/*2;*2/*37;*37/*37	rs71031597	intron_variant	MODIFIER
chr10_94763232_A_T	29	*17/*37;*1/*17;*17/*38;*17/*17;*1/*37	rs7918461	intron_variant	MODIFIER
chr10_94766352_G_A	29	*17/*37;*1/*17;*17/*38;*17/*17;*1/*37	rs35442644	intron_variant	MODIFIER
chr10_94767577_C_A	29	*17/*37;*1/*17;*17/*38;*17/*17;*1/*37	rs11596777	intron_variant	MODIFIER
chr10_94772931_G_A	29	*17/*37;*1/*17;*17/*38;*17/*17;*1/*37	rs4447102	intron_variant	MODIFIER
chr10_94776698_T_A	29	*17/*37;*1/*17;*17/*38;*17/*17;*1/*37	rs7086313	intron_variant	MODIFIER
chr10_94776951_C_T	29	*17/*37;*1/*17;*17/*38;*17/*17;*1/*37	rs7068577	intron_variant	MODIFIER
chr10_94784708_G_A	29	*17/*37;*1/*17;*17/*38;*17/*17;*1/*37	rs7081559	intron_variant	MODIFIER
chr10_94784970_C_G	29	*17/*37;*1/*17;*17/*38;*17/*17;*1/*37	rs7081643	intron_variant	MODIFIER
chr10_94785981_C_T	29	*17/*37;*1/*17;*17/*38;*17/*17;*1/*37	rs12247175	intron_variant	MODIFIER
chr10_94795304_T_G	29	*17/*37;*1/*17;*17/*38;*17/*17;*1/*37	rs11498699	intron_variant	MODIFIER
chr10_94795486_C_A	29	*17/*37;*1/*17;*17/*38;*17/*17;*1/*37	rs11498522	intron_variant	MODIFIER
chr10_94795832_C_G	29	*17/*37;*1/*17;*17/*38;*17/*17;*1/*37	rs11498523	intron_variant	MODIFIER
chr10_94798522_C_G	29	*17/*37;*1/*17;*17/*38;*17/*17;*1/*37	rs9630086	intron_variant	MODIFIER
chr10_94809169_G_A	29	*17/*37;*1/*17;*17/*38;*17/*17;*1/*37	rs11597811	intron_variant	MODIFIER
chr10_94809696_G_C	29	*17/*37;*1/*17;*17/*38;*17/*17;*1/*37	rs7091883	intron_variant	MODIFIER
chr10_94816092_AT_A	29	*17/*37;*1/*17;*17/*38;*17/*17;*1/*37	rs34737722	intron_variant	MODIFIER
chr10_94819214_A_T	29	*17/*37;*1/*17;*17/*38;*17/*17;*1/*37	rs553916163	intron_variant	MODIFIER
chr10_94822399_A_C	29	*17/*37;*1/*17;*17/*38;*17/*17;*1/*37	rs12253253	intron_variant	MODIFIER
chr10_94827531_C_T	29	*17/*37;*1/*17;*17/*38;*17/*17;*1/*37	rs12248975	intron_variant	MODIFIER
chr10_94827790_T_G	29	*17/*37;*1/*17;*17/*38;*17/*17;*1/*37	rs12772139	intron_variant	MODIFIER
chr10_94833462_T_A	29	*17/*37;*1/*17;*17/*38;*17/*17;*1/*37	rs12258243	intron_variant	MODIFIER
chr10_94837994_A_C	29	*17/*37;*1/*17;*17/*38;*17/*17;*1/*37	rs11188092	intron_variant	MODIFIER
chr10_94843657_A_G	29	*17/*37;*1/*17;*17/*38;*17/*17;*1/*37	rs11592737	intron_variant	MODIFIER
chr10_94844516_C_G	29	*17/*37;*1/*17;*17/*38;*17/*17;*1/*37	rs11597626	intron_variant	MODIFIER
chr10_94848458_C_T	29	*17/*37;*1/*17;*17/*38;*17/*17;*1/*37	rs185193180	intron_variant	MODIFIER
chr10_94851871_T_C	29	*17/*37;*1/*17;*17/*38;*17/*17;*1/*37	rs35739901	intron_variant	MODIFIER
chr10_94852283_G_A	29	*17/*37;*1/*17;*17/*38;*17/*17;*1/*37	rs12779363	intron_variant	MODIFIER
chr10_94852614_C_T	29	*17/*37;*1/*17;*17/*38;*17/*17;*1/*37	rs12268020,COSV64907797	intron_variant	MODIFIER
chr10_94854102_TCCA_T	29	*17/*37;*1/*17;*17/*38;*17/*17;*1/*37	rs143377860	3_prime_UTR_variant	MODIFIER
chr10_94761900_C_T	28	*17/*37;*1/*17;*17/*38;*17/*17	rs12248560	upstream gene variant	MODIFIER		rs12248560	CYP2C19*4.002;CYP2C19*17;CYP2C19*17.001
chr10_94792552_G_T	28	*17/*37;*1/*17;*17/*38;*17/*17;*1/*37	rs12268235	intron_variant	MODIFIER
chr10_94798814_A_ATT	28	*1/*17;*1/*37;*1/*1	rs61240923	intron_variant	MODIFIER
chr10_94853547_C_CTT	28	*17/*37;*2/*37;*17/*38;*1/*2;*2/*2	rs34415420	3_prime_UTR_variant	MODIFIER
chr10_94838682_T_G	26	*1/*37;*1/*2;*1/*1;*1/*17;*1/*38;*2/*37	rs11528090	intron_variant	MODIFIER
chr10_94797097_T_G	25	*1/*37;*1/*2;*1/*1;*1/*17;*1/*38;*2/*37	rs11498700	intron_variant	MODIFIER
chr10_94818820_A_G	25	*17/*37;*1/*17;*17/*38;*17/*17;*1/*37	rs61886230	intron_variant	MODIFIER
chr10_94776299_A_G	23	*1/*37;*1/*2;*1/*1;*1/*17;*1/*38	rs4388808	intron_variant	MODIFIER
chr10_94851443_CAAATAAATAAAT_CAAATAAAT	23	*17/*37;*1/*17;*1/*1;*1/*38;*1/*37;*2/*37;*1/*2;*17/*38	chr10_94851443_CAAATAAATAAAT_CAAATAAAT	intron_variant	MODIFIER	Novel
chr10_94763288_A_T	22	*2/*37;*1/*2;*2/*2	rs10509676	intron_variant	MODIFIER
chr10_94763313_G_A	22	*2/*37;*1/*2;*2/*2	rs17882547	intron_variant	MODIFIER
chr10_94763314_C_T	22	*2/*37;*1/*2;*2/*2	rs17884974	intron_variant	MODIFIER
chr10_94763316_G_A	22	*2/*37;*1/*2;*2/*2	rs17882066	intron_variant	MODIFIER
chr10_94763326_T_C	22	*2/*37;*1/*2;*2/*2	rs12773342	intron_variant	MODIFIER
chr10_94764128_C_T	22	*2/*37;*1/*2;*2/*2	rs138737109	intron_variant	MODIFIER
chr10_94766108_G_A	22	*2/*37;*1/*2;*2/*2	rs12768009	intron_variant	MODIFIER
chr10_94766201_CAACAGTCATTTGCCAGGGAAGG_C	22	*2/*37;*1/*2;*2/*2	rs146441581	intron_variant	MODIFIER
chr10_94767885_G_A	22	*2/*37;*1/*2;*2/*2	rs35751085	intron_variant	MODIFIER
chr10_94768927_G_T	22	*2/*37;*1/*2;*2/*2	rs12572917	intron_variant	MODIFIER
chr10_94769055_A_T	22	*2/*37;*1/*2;*2/*2	rs71482318,COSV64906790	intron_variant	MODIFIER
chr10_94774506_C_T	22	*2/*37;*1/*2;*2/*2	rs6583954	intron_variant	MODIFIER
chr10_94775367_A_G	22	*2/*37;*1/*2;*2/*2	rs12769205,COSV64907469,CS155448	intron_variant	MODIFIER		rs12769205	CYP2C19*2;CYP2C19*2.001;CYP2C19*2.002;CYP2C19*2.003;CYP2C19*2.004;CYP2C19*2.005;CYP2C19*2.006;CYP2C19*2.007;CYP2C19*2.008;CYP2C19*2.009;CYP2C19*2.010;CYP2C19*2.011;CYP2C19*2.012;CYP2C19*35;CYP2C19*35.001;CYP2C19*35.002
chr10_94776470_T_A	22	*2/*37;*1/*2;*2/*2	rs12778026	intron_variant	MODIFIER
chr10_94777232_T_C	22	*2/*37;*1/*2;*2/*2	rs58447435	intron_variant	MODIFIER
chr10_94778957_T_A	22	*2/*37;*1/*2;*2/*2	rs7919524	intron_variant	MODIFIER
chr10_94781859_G_A	22	*2/*37;*1/*2;*2/*2	rs4244285,COSV64906812,CS941458	synonymous_variant	LOW		rs4244285	CYP2C19*2;CYP2C19*2.001;CYP2C19*2.002;CYP2C19*2.003;CYP2C19*2.004;CYP2C19*2.005;CYP2C19*2.006;CYP2C19*2.007;CYP2C19*2.008;CYP2C19*2.009;CYP2C19*2.010;CYP2C19*2.011;CYP2C19*2.012
chr10_94782225_A_G	22	*2/*37;*1/*2;*2/*2	rs12571421	intron_variant	MODIFIER
chr10_94784066_T_G	22	*2/*37;*1/*2;*2/*2	rs35390752	intron_variant	MODIFIER
chr10_94787706_C_T	22	*2/*37;*1/*2;*2/*2	rs12767583	intron_variant	MODIFIER
chr10_94788559_T_C	22	*2/*37;*1/*2;*2/*2	rs67120915	intron_variant	MODIFIER
chr10_94791495_G_T	22	*2/*37;*1/*2;*2/*2	rs145364562	intron_variant	MODIFIER
chr10_94795363_A_G	22	*2/*37;*1/*2;*2/*2	rs150069858	intron_variant	MODIFIER
chr10_94798814_A_AT	22	*1/*17;*1/*37;*1/*1	rs61240923	intron_variant	MODIFIER
chr10_94801279_T_A	22	*2/*37;*1/*2;*2/*2	rs56229007	intron_variant	MODIFIER
chr10_94801768_A_G	22	*2/*37;*1/*2;*2/*2	rs7911008	intron_variant	MODIFIER
chr10_94806656_G_A	22	*2/*37;*1/*2;*2/*2	rs34121168	intron_variant	MODIFIER
chr10_94807132_A_G	22	*2/*37;*1/*2;*2/*2	rs12772672	intron_variant	MODIFIER
chr10_94807629_C_T	22	*2/*37;*1/*2;*2/*2	rs4641393	intron_variant	MODIFIER
chr10_94810382_G_A	22	*2/*37;*1/*2;*2/*2	rs143814980	intron_variant	MODIFIER
chr10_94811953_G_GT	22	*2/*37;*1/*2;*2/*2	rs150497315	intron_variant	MODIFIER
chr10_94812174_C_T	22	*2/*37;*1/*2;*2/*2	rs12572085	intron_variant	MODIFIER
chr10_94813990_C_T	22	*2/*37;*1/*2;*2/*2	rs3980254,COSV64907793	intron_variant	MODIFIER
chr10_94814902_T_C	22	*2/*37;*1/*2;*2/*2	rs2260946	intron_variant	MODIFIER
chr10_94815312_C_G	22	*2/*37;*1/*2;*2/*2	rs1853205	intron_variant	MODIFIER
chr10_94815485_C_T	22	*2/*37;*1/*2;*2/*2	rs1322179	intron_variant	MODIFIER
chr10_94817023_A_G	22	*2/*37;*1/*2;*2/*2	rs373322185,COSV64908786	intron_variant	MODIFIER
chr10_94819488_A_G	22	*2/*37;*1/*2;*2/*2	rs1240413848	intron_variant	MODIFIER
chr10_94819533_C_T	22	*2/*37;*1/*2;*2/*2	rs1440471977	intron_variant	MODIFIER
chr10_94820445_C_G	22	*2/*37;*1/*2;*2/*2	rs4417205,COSV64907197	intron_variant	MODIFIER
chr10_94825798_G_C	22	*2/*37;*1/*2;*2/*2	rs71482320	intron_variant	MODIFIER
chr10_94829673_T_C	22	*2/*37;*1/*2;*2/*2	rs147528722	intron_variant	MODIFIER
chr10_94829705_C_T	22	*2/*37;*1/*2;*2/*2	rs148589627	intron_variant	MODIFIER
chr10_94830311_C_T	22	*2/*37;*1/*2;*2/*2	rs4445573	intron_variant	MODIFIER
chr10_94837046_G_GA	22	*2/*37;*1/*2;*2/*2	rs34986692	intron_variant	MODIFIER
chr10_94839520_A_G	22	*2/*37;*1/*2;*2/*2	rs7911654	intron_variant	MODIFIER
chr10_94840898_C_T	22	*2/*37;*1/*2;*2/*2	rs12775283,COSV64908568	intron_variant	MODIFIER
chr10_94842641_T_A	22	*2/*37;*1/*2;*2/*2	rs28399513	intron_variant	MODIFIER
chr10_94842865_C_T	22	*2/*37;*1/*2;*2/*2	rs3758580,COSV64906817	synonymous_variant	LOW		rs3758580	CYP2C19*2.001;CYP2C19*2.002;CYP2C19*2.003;CYP2C19*2.004;CYP2C19*2.005;CYP2C19*2.006;CYP2C19*2.007;CYP2C19*2.008;CYP2C19*2.009;CYP2C19*2.010;CYP2C19*2.011;CYP2C19*2.012
chr10_94844108_C_CT	22	*2/*37;*1/*2;*2/*2	rs34374889	intron_variant	MODIFIER
chr10_94849337_A_T	22	*2/*37;*1/*2;*2/*2	rs12098606,COSV64908655	intron_variant	MODIFIER
chr10_94849429_GA_G	22	*2/*37;*1/*2;*2/*2	rs56881482	intron_variant	MODIFIER
chr10_94852242_A_AG	22	*2/*37;*1/*2;*2/*2	rs17884928	intron_variant	MODIFIER
chr10_94854968_G_T	22	*2/*37;*1/*2;*2/*2	rs35709381	3_prime_UTR_variant	MODIFIER
chr10_94779551_T_TTTTTCTTTTCTTTTC	21	*2/*37;*17/*37;*1/*2;*2/*2	rs6144036	intron_variant	MODIFIER
chr10_94851443_CAAATAAATAAAT_CAAAT	20	*2/*37;*1/*37;*1/*1;*1/*38;*1/*2	chr10_94851443_CAAATAAATAAAT_CAAAT	intron_variant	MODIFIER	Novel
chr10_94814166_C_T	17	*1/*17;*1/*37;*1/*1;*1/*38;*1/*2	rs2264932,COSV64909365	intron_variant	MODIFIER
chr10_94764638_C_T	16	*1/*37;*17/*38;*1/*38	rs58667319,COSV64909709	intron_variant	MODIFIER
chr10_94778106_A_T	15	*1/*37;*1/*1;*1/*38;*1/*17	rs61886222	intron_variant	MODIFIER
chr10_94786215_C_T	15	*1/*37;*1/*1;*1/*38;*1/*17	rs56358710	intron_variant	MODIFIER
chr10_94827994_C_T	15	*1/*37;*1/*1;*1/*38;*2/*37	rs199562446	intron_variant	MODIFIER
chr10_94831527_C_G	15	*1/*37;*1/*1;*1/*38;*2/*37	rs4917612	intron_variant	MODIFIER
chr10_94798814_ATTT_A	14	*1/*2;*2/*2;*2/*37	rs61240923	intron_variant	MODIFIER
chr10_94794161_C_T	13	*1/*37;*17/*38;*1/*38	rs117716164	intron_variant	MODIFIER
chr10_94842393_GT_GTT	13	*2/*37;*1/*2	chr10_94842393_GT_GTT	intron_variant	MODIFIER	Novel
chr10_94763645_G_A	12	*1/*37;*17/*38;*1/*38	rs17879263	intron_variant	MODIFIER
chr10_94765543_G_C	12	*1/*37;*17/*38;*1/*38	rs111579015	intron_variant	MODIFIER
chr10_94766774_A_C	12	*1/*37;*17/*38;*1/*38	rs112773738	intron_variant	MODIFIER
chr10_94767627_G_C	12	*1/*37;*17/*38;*1/*38	rs59826872	intron_variant	MODIFIER
chr10_94768673_T_C	12	*1/*37;*17/*38;*1/*38	rs57957726	intron_variant	MODIFIER
chr10_94769787_T_C	12	*1/*37;*17/*38;*1/*38	rs117395468	intron_variant	MODIFIER
chr10_94770503_T_C	12	*1/*37;*17/*38;*1/*38	rs75539551	intron_variant	MODIFIER
chr10_94770740_A_G	12	*1/*37;*17/*38;*1/*38	rs146058526	intron_variant	MODIFIER
chr10_94771503_T_G	12	*1/*37;*17/*38;*1/*38	rs112543932	intron_variant	MODIFIER
chr10_94771612_T_G	12	*1/*37;*17/*38;*1/*38	rs150991980	intron_variant	MODIFIER
chr10_94771841_C_T	12	*1/*37;*17/*38;*1/*38	rs146936435	intron_variant	MODIFIER
chr10_94772316_T_C	12	*1/*37;*17/*38;*1/*38	rs111789203	intron_variant	MODIFIER
chr10_94772882_T_C	12	*1/*37;*17/*38;*1/*38	rs188907790	intron_variant	MODIFIER
chr10_94773173_G_A	12	*1/*37;*17/*38;*1/*38	rs61249521	intron_variant	MODIFIER
chr10_94773416_C_T	12	*1/*37;*17/*38;*1/*38	rs112732395	intron_variant	MODIFIER
chr10_94773830_T_C	12	*1/*37;*17/*38;*1/*38	rs76418162	intron_variant	MODIFIER
chr10_94774010_A_G	12	*1/*37;*17/*38;*1/*38	rs60214908	intron_variant	MODIFIER
chr10_94774286_T_A	12	*1/*37;*17/*38;*1/*38	rs55805503	intron_variant	MODIFIER
chr10_94774477_A_G	12	*1/*37;*17/*38;*1/*38	rs17885348	intron_variant	MODIFIER
chr10_94774718_T_G	12	*1/*37;*17/*38;*1/*38	rs17884832	intron_variant	MODIFIER
chr10_94775871_T_C	12	*1/*37;*17/*38;*1/*38	rs17879992	intron_variant	MODIFIER
chr10_94777970_CA_C	12	*1/*37;*17/*38;*1/*38	rs138660413	intron_variant	MODIFIER
chr10_94779387_A_G	12	*1/*37;*17/*38;*1/*38	rs17878673	intron_variant	MODIFIER
chr10_94780223_CTT_C	12	*1/*37;*17/*38;*1/*38	rs17885417	intron_variant	MODIFIER
chr10_94781132_G_A	12	*1/*37;*17/*38;*1/*38	rs4304697	intron_variant	MODIFIER
chr10_94781616_A_G	12	*1/*37;*17/*38;*1/*38	rs7088784	intron_variant	MODIFIER		rs7088784	CYP2C19*3.002
chr10_94782932_A_G	12	*1/*37;*17/*38;*1/*38	rs116409382	intron_variant	MODIFIER
chr10_94783996_C_G	12	*1/*37;*17/*38;*1/*38	rs80259168	intron_variant	MODIFIER
chr10_94785058_T_C	12	*1/*37;*17/*38;*1/*38	rs75374791	intron_variant	MODIFIER
chr10_94785223_C_T	12	*1/*37;*17/*38;*1/*38	rs57584668	intron_variant	MODIFIER
chr10_94785718_C_T	12	*1/*37;*17/*38;*1/*38	rs79103432	intron_variant	MODIFIER
chr10_94785875_C_T	12	*1/*37;*17/*38;*1/*38	rs113089853	intron_variant	MODIFIER
chr10_94786263_T_A	12	*1/*37;*17/*38;*1/*38	rs77419080	intron_variant	MODIFIER
chr10_94786489_G_T	12	*1/*37;*17/*38;*1/*38	rs77921213	intron_variant	MODIFIER
chr10_94786940_A_C	12	*1/*37;*17/*38;*1/*38	rs74636383	intron_variant	MODIFIER
chr10_94787599_T_A	12	*1/*37;*17/*38;*1/*38	rs61153799	intron_variant	MODIFIER
chr10_94787979_T_A	12	*1/*37;*17/*38;*1/*38	rs112573749	intron_variant	MODIFIER
chr10_94788733_C_T	12	*1/*37;*17/*38;*1/*38	rs57822910	intron_variant	MODIFIER
chr10_94789120_G_GT	12	*1/*37;*17/*38;*1/*38	rs142851331	intron_variant	MODIFIER
chr10_94789729_C_T	12	*1/*37;*17/*38;*1/*38	rs78397134	intron_variant	MODIFIER
chr10_94790102_A_T	12	*1/*37;*17/*38;*1/*38	rs148214119	intron_variant	MODIFIER
chr10_94790124_CT_C	12	*1/*37;*17/*38;*1/*38	rs202060631	intron_variant	MODIFIER
chr10_94790320_A_T	12	*1/*37;*17/*38;*1/*38	rs9663112	intron_variant	MODIFIER
chr10_94791162_T_A	12	*1/*37;*17/*38;*1/*38	rs145340760	intron_variant	MODIFIER
chr10_94791333_A_G	12	*1/*37;*17/*38;*1/*38	rs7076898	intron_variant	MODIFIER
chr10_94791335_C_T	12	*1/*37;*17/*38;*1/*38	rs7077029	intron_variant	MODIFIER
chr10_94791459_G_C	12	*1/*37;*17/*38;*1/*38	rs112263145	intron_variant	MODIFIER
chr10_94791718_G_A	12	*1/*37;*17/*38;*1/*38	rs141144882	intron_variant	MODIFIER
chr10_94792430_C_T	12	*1/*37;*17/*38;*1/*38	rs183590790	intron_variant	MODIFIER
chr10_94792431_T_A	12	*1/*37;*17/*38;*1/*38	rs77819408	intron_variant	MODIFIER
chr10_94792570_A_G	12	*1/*37;*17/*38;*1/*38	rs77120885	intron_variant	MODIFIER
chr10_94793742_G_C	12	*1/*37;*17/*38;*1/*38	rs58349349,COSV64908962	intron_variant	MODIFIER
chr10_94793763_G_A	12	*1/*37;*17/*38;*1/*38	rs117381226	intron_variant	MODIFIER
chr10_94793820_A_G	12	*1/*37;*17/*38;*1/*38	rs113641915	intron_variant	MODIFIER
chr10_94793932_T_G	12	*1/*37;*17/*38;*1/*38	rs111853758	intron_variant	MODIFIER
chr10_94793996_G_A	12	*1/*37;*17/*38;*1/*38	rs191991016	intron_variant	MODIFIER
chr10_94794001_T_G	12	*1/*37;*17/*38;*1/*38	rs57079861	intron_variant	MODIFIER
chr10_94794292_C_G	12	*1/*37;*17/*38;*1/*38	rs9663214	intron_variant	MODIFIER
chr10_94795014_T_C	12	*1/*37;*17/*38;*1/*38	rs112038911	intron_variant	MODIFIER
chr10_94795559_T_G	12	*1/*37;*17/*38;*1/*38	rs9663965	intron_variant	MODIFIER
chr10_94795690_A_G	12	*1/*37;*17/*38;*1/*38	rs9664621	intron_variant	MODIFIER
chr10_94795848_GT_G	12	*1/*37;*17/*38;*1/*38	rs200069419	intron_variant	MODIFIER
chr10_94796559_G_A	12	*1/*37;*17/*38;*1/*38	rs139619180	intron_variant	MODIFIER
chr10_94796914_T_A	12	*1/*37;*17/*38;*1/*38	rs113036428	intron_variant	MODIFIER
chr10_94797455_G_T	12	*1/*37;*17/*38;*1/*38	rs116855710	intron_variant	MODIFIER
chr10_94800730_T_C	12	*1/*37;*17/*38;*1/*38	rs78497745	intron_variant	MODIFIER
chr10_94800861_T_G	12	*1/*37;*17/*38;*1/*38	rs77460358	intron_variant	MODIFIER
chr10_94800938_A_G	12	*1/*37;*17/*38;*1/*38	rs79187906	intron_variant	MODIFIER
chr10_94801154_C_T	12	*1/*37;*17/*38;*1/*38	rs75254631	intron_variant	MODIFIER
chr10_94802231_G_A	12	*1/*37;*17/*38;*1/*38	rs113546720	intron_variant	MODIFIER
chr10_94802725_T_C	12	*1/*37;*17/*38;*1/*38	rs113684911	intron_variant	MODIFIER
chr10_94805394_A_C	12	*1/*37;*17/*38;*1/*38	rs78779059	intron_variant	MODIFIER
chr10_94806941_A_G	12	*1/*37;*17/*38;*1/*38	rs74804603	intron_variant	MODIFIER
chr10_94807022_T_G	12	*1/*37;*17/*38;*1/*38	rs77635509	intron_variant	MODIFIER
chr10_94810070_C_T	12	*1/*37;*17/*38;*1/*38	rs112859410	intron_variant	MODIFIER
chr10_94810519_C_CTT	12	*1/*37;*17/*38;*1/*38	rs59589203	intron_variant	MODIFIER
chr10_94810752_G_T	12	*1/*37;*17/*38;*1/*38	rs184377978	intron_variant	MODIFIER
chr10_94811442_A_C	12	*1/*37;*17/*38;*1/*38	rs112616341	intron_variant	MODIFIER
chr10_94813639_C_G	12	*1/*37;*17/*38;*1/*38	rs113153908	intron_variant	MODIFIER
chr10_94814498_C_T	12	*1/*37;*17/*38;*1/*38	rs112082007	intron_variant	MODIFIER
chr10_94814942_C_T	12	*1/*37;*17/*38;*1/*38	rs113225663	intron_variant	MODIFIER
chr10_94815523_A_G	12	*1/*37;*17/*38;*1/*38	rs74152369	intron_variant	MODIFIER
chr10_94816233_A_AT	12	*1/*37;*17/*38;*1/*38	rs11461829	intron_variant	MODIFIER
chr10_94816353_T_C	12	*1/*37;*17/*38;*1/*38	rs10509677	intron_variant	MODIFIER
chr10_94816433_A_C	12	*1/*37;*17/*38;*1/*38	rs10509678	intron_variant	MODIFIER
chr10_94817213_C_T	12	*1/*37;*17/*38;*1/*38	rs1371703780	intron_variant	MODIFIER
chr10_94817349_A_C	12	*1/*37;*17/*38;*1/*38	rs112029676	intron_variant	MODIFIER
chr10_94819761_C_A	12	*1/*37;*17/*38;*1/*38	rs1185602068	intron_variant	MODIFIER
chr10_94820307_A_T	12	*1/*37;*17/*38;*1/*38	rs55732648	intron_variant	MODIFIER
chr10_94820383_T_G	12	*1/*37;*17/*38;*1/*38	rs28399511	intron_variant	MODIFIER
chr10_94822917_A_AT	12	*1/*37;*17/*38;*1/*38	rs552158198	intron_variant	MODIFIER
chr10_94823157_G_A	12	*1/*37;*17/*38;*1/*38	rs75280500	intron_variant	MODIFIER
chr10_94828372_C_G	12	*1/*37;*17/*38;*1/*38	rs373271444	intron_variant	MODIFIER
chr10_94828492_C_CT	12	*1/*37;*17/*38;*1/*38	rs879445634	intron_variant	MODIFIER
chr10_94829381_C_G	12	*1/*37;*17/*38;*1/*38	rs143215313	intron_variant	MODIFIER
chr10_94829658_CAA_C	12	*1/*37;*17/*38;*1/*38	rs375062936	intron_variant	MODIFIER
chr10_94829704_A_G	12	*1/*37;*17/*38;*1/*38	rs185680134	intron_variant	MODIFIER
chr10_94829728_G_A	12	*1/*37;*17/*38;*1/*38	rs372116953	intron_variant	MODIFIER
chr10_94829967_A_G	12	*1/*37;*17/*38;*1/*38	rs180944671	intron_variant	MODIFIER
chr10_94830224_A_C	12	*1/*37;*17/*38;*1/*38	rs112910448,COSV64909495	intron_variant	MODIFIER
chr10_94831213_C_CT	12	*1/*37;*17/*38;*1/*38	rs201682436	intron_variant	MODIFIER
chr10_94834943_C_T	12	*1/*37;*17/*38;*1/*38	rs111406687	intron_variant	MODIFIER
chr10_94836394_G_GT	12	*1/*37;*17/*38;*1/*38	rs568156376	intron_variant	MODIFIER
chr10_94836679_G_A	12	*1/*37;*17/*38;*1/*38	rs112151434,COSV64909386	intron_variant	MODIFIER
chr10_94836726_C_T	12	*1/*37;*17/*38;*1/*38	rs113461058	intron_variant	MODIFIER
chr10_94836884_C_G	12	*1/*37;*17/*38;*1/*38	rs111732980	intron_variant	MODIFIER
chr10_94836938_GC_G	12	*1/*37;*17/*38;*1/*38	rs200441094	intron_variant	MODIFIER
chr10_94836993_C_G	12	*1/*37;*17/*38;*1/*38	rs142070501	intron_variant	MODIFIER
chr10_94838559_C_T	12	*1/*37;*17/*38;*1/*38	rs112194017	intron_variant	MODIFIER
chr10_94839058_A_G	12	*1/*37;*17/*38;*1/*38	rs74154112	intron_variant	MODIFIER
chr10_94840004_A_T	12	*1/*37;*17/*38;*1/*38	rs77044967	intron_variant	MODIFIER
chr10_94840366_G_A	12	*1/*37;*17/*38;*1/*38	rs146630622	intron_variant	MODIFIER
chr10_94841387_G_A	12	*1/*37;*17/*38;*1/*38	rs117756203	intron_variant	MODIFIER
chr10_94842004_C_T	12	*1/*37;*17/*38;*1/*38	rs78259677	intron_variant	MODIFIER
chr10_94843334_T_A	12	*1/*37;*17/*38;*1/*38	rs78431362	intron_variant	MODIFIER
chr10_94843988_T_C	12	*1/*37;*17/*38;*1/*38	rs78609324	intron_variant	MODIFIER
chr10_94847919_C_G	12	*1/*37;*17/*38;*1/*38	rs144599632	intron_variant	MODIFIER
chr10_94848507_A_G	12	*1/*37;*17/*38;*1/*38	rs113798338	intron_variant	MODIFIER
chr10_94850325_A_T	12	*1/*37;*17/*38;*1/*38	rs17885052	intron_variant	MODIFIER
chr10_94850871_C_G	12	*1/*37;*17/*38;*1/*38	rs17878627	intron_variant	MODIFIER
chr10_94850874_T_C	12	*1/*37;*17/*38;*1/*38	rs17878382	intron_variant	MODIFIER
chr10_94851420_C_T	12	*1/*37;*17/*38;*1/*38	rs76828799	intron_variant	MODIFIER
chr10_94808276_TA_T	11	*1/*37;*17/*38;*1/*38	rs112984453	intron_variant	MODIFIER
chr10_94810744_A_T	11	*1/*37;*17/*38;*1/*38	rs113018075	intron_variant	MODIFIER
chr10_94816272_AT_A	11	*1/*37;*17/*38;*1/*38	rs372796843	intron_variant	MODIFIER
chr10_94829054_C_T	11	*1/*37;*17/*38;*1/*38	rs139202257	intron_variant	MODIFIER
chr10_94849317_T_TTTTA	11	*17/*37;*17/*17;*1/*37;*1/*17	rs199951526	intron_variant	MODIFIER
chr10_94853547_C_CTTTT	11	*1/*37;*17/*38;*1/*38	rs34415420	3_prime_UTR_variant	MODIFIER
chr10_94851443_CAAATAAAT_C	10	*1/*2;*2/*2;*1/*1;*2/*37;*17/*17;*1/*17	rs71031598	intron_variant	MODIFIER
chr10_94819221_C_G	9	*17/*37;*17/*38;*17/*17;*1/*17	rs753727776	intron_variant	MODIFIER
chr10_94853007_C_A	9	*17/*37;*1/*37;*2/*37	rs775981161	3_prime_UTR_variant	MODIFIER
chr10_94789438_G_A	8	*1/*17;*1/*1;*1/*37	rs148879826	intron_variant	MODIFIER
chr10_94798814_AT_A	8	*1/*37;*1/*38	rs61240923	intron_variant	MODIFIER
chr10_94826976_G_A	8	*1/*17;*17/*17	rs575164865	intron_variant	MODIFIER
chr10_94851345_G_T	8	*1/*17;*17/*17	rs141019273	intron_variant	MODIFIER
chr10_94814191_A_T	7	*1/*37;*1/*1;*1/*38;*2/*37	rs138056307	intron_variant	MODIFIER
chr10_94828776_T_C	7	*1/*2;*1/*17;*1/*37;*1/*1	rs192304457	intron_variant	MODIFIER
chr10_94840228_C_CT	7	*2/*37;*1/*37;*1/*2;*1/*1	rs113238504	intron_variant	MODIFIER
chr10_94848105_G_T	7	*1/*37;*17/*38;*1/*38	rs191490519	intron_variant	MODIFIER
chr10_94767915_G_T	6	*1/*17;*1/*37;*1/*38;*1/*1;*1/*2	rs139287929	intron_variant	MODIFIER
chr10_94775539_G_C	6	*2/*37;*1/*2	rs181297724,CM116497	missense_variant&splice_region_variant	MODERATE		rs181297724	CYP2C19*2.003
chr10_94804659_C_T	6	*2/*37;*1/*2	rs149894564	intron_variant	MODIFIER
chr10_94818012_CAAA_C	6	*1/*37;*17/*38;*1/*38	rs71031597	intron_variant	MODIFIER
chr10_94819434_A_C	6	*2/*37;*1/*2	rs1162806396	intron_variant	MODIFIER
chr10_94829511_C_A	6	*2/*37;*1/*2	rs189816519	intron_variant	MODIFIER
chr10_94770170_T_A	5	*1/*1;*1/*38;*1/*37	rs112698118	intron_variant	MODIFIER
chr10_94772971_C_T	5	*1/*1;*1/*37;*1/*38;*1/*2	rs189423009	intron_variant	MODIFIER
chr10_94775165_G_C	5	*2/*37;*1/*2;*2/*2	rs17878459,CM983292,COSV64908174	missense_variant	MODERATE		rs17878459	CYP2C19*2.002;CYP2C19*2.010;CYP2C19*2.012
chr10_94776309_T_C	5	*1/*37;*17/*38;*1/*38	rs17882839	intron_variant	MODIFIER
chr10_94792054_G_A	5	*2/*37;*1/*2;*2/*2	rs149247378	intron_variant	MODIFIER
chr10_94793125_C_T	5	*1/*17;*1/*37;*1/*1	rs185198079	intron_variant	MODIFIER
chr10_94799259_C_T	5	*1/*17;*1/*37;*1/*1	rs187652917	intron_variant	MODIFIER
chr10_94805894_G_A	5	*2/*37;*1/*2;*2/*2	rs72816679	intron_variant	MODIFIER
chr10_94811081_T_C	5	*1/*37;*17/*38;*1/*38	rs143567781	intron_variant	MODIFIER
chr10_94812965_C_A	5	*2/*2;*2/*37;*1/*2	rs147746596	intron_variant	MODIFIER
chr10_94816724_C_T	5	*1/*37;*1/*1	rs560447643	intron_variant	MODIFIER
chr10_94817264_T_C	5	*1/*37;*17/*38;*1/*38	rs1254148755	intron_variant	MODIFIER
chr10_94817858_A_G	5	*2/*2;*2/*37;*1/*2	rs547316679	intron_variant	MODIFIER
chr10_94818936_A_C	5	*2/*2;*2/*37;*1/*2	rs185727935	intron_variant	MODIFIER
chr10_94823860_A_G	5	*2/*2;*2/*37;*1/*2	rs72816682	intron_variant	MODIFIER
chr10_94828623_C_T	5	*2/*2;*2/*37;*1/*2	rs1451600813	intron_variant	MODIFIER
chr10_94850979_G_A	5	*2/*2;*2/*37;*1/*2	rs72816685	intron_variant	MODIFIER
chr10_94851443_CAAATAAAT_CAAAT	5	*2/*2;*17/*17;*1/*17	chr10_94851443_CAAATAAAT_CAAAT	intron_variant	MODIFIER	Novel
chr10_94767055_G_A	4	*1/*2;*1/*37;*1/*1	rs143622857	intron_variant	MODIFIER
chr10_94772334_G_A	4	*1/*1;*1/*37	rs143752204	intron_variant	MODIFIER
chr10_94787063_G_A	4	*1/*37;*17/*38;*1/*38	rs187478993	intron_variant	MODIFIER
chr10_94795942_G_C	4	*1/*37;*1/*1	rs182861936	intron_variant	MODIFIER
chr10_94798814_AT_ATT	4	*1/*38	chr10_94798814_AT_ATT	intron_variant	MODIFIER	Novel
chr10_94816244_C_CT	4	*1/*37;*17/*38;*1/*38	rs535862340	intron_variant	MODIFIER
chr10_94818012_CAAA_CAA	4	*1/*37;*1/*38	chr10_94818012_CAAA_CAA	intron_variant	MODIFIER	Novel
chr10_94824979_C_CATGAACTCATCATTTTTTATGGCTGCATAGTATTCCATGGTGTATATGTGCCACATTTTCTTTTTTTTTTTTTTTTTTTTTTTTTTTTTATTATACTCTAAGTTTTAGGGTACATGTGCACATTGTGCAGGTTAGTTACATATGTATACATGTGCCATGCTGGTGCGCTGCACCCACTAATGTGTCATCTAGCATTAGGTATATCTCCCAATGCTATCCCTCCCCCCTCCCCCGACCCCACCACAGTCCCCAGAGTGTGATATTCCCCTTCCTGTGTCCATGTGATCTCATTGTTCAATTCCCACCTATGAGTGAGAATATGCGGTGTTTGGTTTTTTGTTCTTGCGATAGTTTACTGAGAATGATGGTTTCCAATTTCAT…	4	*17/*37;*1/*17	chr10_94824979_C_CATGAACTCATCATTTTTTATGGCTGCATAGTATTCCATGGTGTATATGTGCCACATTTTCTTTTTTTTTTTTTTTTTTTTTTTTTTTTTATTATACTCTAAGTTTTAGGGTACATGTGCACATTGTGCAGGTTAGTTACATATGTATACATGTGCCATGCTGGTGCGCTGCACCCACTAATGTGTCATCTAGCATTAGGTATATCTCCCAATGCTATCCCTCCCCCCTCCCCCGACCCCACCACAGTCCCCAGAGTGTGATATTCCCCTTCCTGTGTCCATGTGATCTCATTGTTCAATTCCCACCTATGAGTGAGAATATGCGGTGTTTGGTTTTTTGTTCTTGCGATAGTTTACTGAGAATGATGGTTTCCAATTTCAT…	intron_variant	MODIFIER	Novel
chr10_94824979_C_CATGAACTCATCATTTTTTATGGCTGCATAGTATTCCATGGTGTATATGTGCCACATTTTCTTTTTTTTTTTTTTTTTTTTTTTTTTTTTTATTATACTCTAAGTTTTAGGGTACATGTGCACATTGTGCAGGTTAGTTACATATGTATACATGTGCCATGCTGGTGCGCTGCACCCACTAATGTGTCATCTAGCATTAGGTATATCTCCCAATGCTATCCCTCCCCCCTCCCCCGACCCCACCACAGTCCCCAGAGTGTGATATTCCCCTTCCTGTGTCCATGTGATCTCATTGTTCAATTCCCACCTATGAGTGAGAATATGCGGTGTTTGGTTTTTTGTTCTTGCGATAGTTTACTGAGAATGATGGTTTCCAATTTCA…	4	*1/*17;*17/*37	chr10_94824979_C_CATGAACTCATCATTTTTTATGGCTGCATAGTATTCCATGGTGTATATGTGCCACATTTTCTTTTTTTTTTTTTTTTTTTTTTTTTTTTTTATTATACTCTAAGTTTTAGGGTACATGTGCACATTGTGCAGGTTAGTTACATATGTATACATGTGCCATGCTGGTGCGCTGCACCCACTAATGTGTCATCTAGCATTAGGTATATCTCCCAATGCTATCCCTCCCCCCTCCCCCGACCCCACCACAGTCCCCAGAGTGTGATATTCCCCTTCCTGTGTCCATGTGATCTCATTGTTCAATTCCCACCTATGAGTGAGAATATGCGGTGTTTGGTTTTTTGTTCTTGCGATAGTTTACTGAGAATGATGGTTTCCAATTTCA…	intron_variant	MODIFIER	Novel
chr10_94826675_G_T	4	*2/*37;*2/*2;*1/*2	rs535781619	intron_variant	MODIFIER
chr10_94826816_A_G	4	*1/*37;*1/*1	rs548565374	intron_variant	MODIFIER
chr10_94839728_A_G	4	*1/*37;*1/*1	rs117282042	intron_variant	MODIFIER
chr10_94842393_G_GT	4	*2/*2	rs57865512	intron_variant	MODIFIER
chr10_94851443_CAAAT_C	4	*1/*17;*17/*17;*1/*2	rs71031598	intron_variant	MODIFIER
chr10_94763351_G_A	3	*1/*1;*1/*38	rs17879750	intron_variant	MODIFIER
chr10_94763373_C_T	3	*1/*37	rs17879466	intron_variant	MODIFIER
chr10_94776561_C_A	3	*17/*37	rs757207050	intron_variant	MODIFIER
chr10_94779566_C_CTTTTCTTTTCT	3	*1/*37;*17/*37;*1/*38	rs762886433	intron_variant	MODIFIER
chr10_94797292_G_A	3	*1/*1;*1/*38	rs183102260	intron_variant	MODIFIER
chr10_94798814_A_ATTT	3	*1/*37	rs61240923	intron_variant	MODIFIER
chr10_94798814_ATTT_AT	3	*2/*37	chr10_94798814_ATTT_AT	intron_variant	MODIFIER	Novel
chr10_94798814_ATTT_ATTTT	3	*1/*2	chr10_94798814_ATTT_ATTTT	intron_variant	MODIFIER	Novel
chr10_94798814_ATTT_ATTTTT	3	*1/*2	chr10_94798814_ATTT_ATTTTT	intron_variant	MODIFIER	Novel
chr10_94800642_A_G	3	*1/*37	rs150778851	intron_variant	MODIFIER
chr10_94803359_G_A	3	*17/*37	rs562521857	intron_variant	MODIFIER
chr10_94811988_A_G	3	*17/*37	rs112798478	intron_variant	MODIFIER
chr10_94818365_T_G	3	*1/*37	rs182061892	intron_variant	MODIFIER
chr10_94819975_C_G	3	*2/*37;*1/*37;*1/*17	rs372177179	intron_variant	MODIFIER
chr10_94824728_CAT_C	3	*2/*37;*1/*2	rs548484156	intron_variant	MODIFIER
chr10_94827447_C_T	3	*17/*38;*1/*38	rs560005853	intron_variant	MODIFIER
chr10_94827448_A_G	3	*17/*38;*1/*38	rs573512744	intron_variant	MODIFIER
chr10_94828754_A_G	3	*1/*2;*1/*1	rs545233050	intron_variant	MODIFIER
chr10_94831511_T_A	3	*1/*37;*1/*38;*1/*1	rs145077708	intron_variant	MODIFIER
chr10_94831787_T_C	3	*1/*37;*1/*38;*1/*1	rs151153167	intron_variant	MODIFIER
chr10_94842251_GT_G	3	*1/*17;*1/*37	rs1380960442	intron_variant	MODIFIER
chr10_94764187_C_T	2	*1/*38	rs113810268	intron_variant	MODIFIER
chr10_94764202_G_T	2	*1/*2;*1/*37	rs148954322	intron_variant	MODIFIER
chr10_94766503_A_G	2	*1/*1;*1/*38	rs188516914	intron_variant	MODIFIER
chr10_94768750_T_C	2	*1/*1;*1/*2	rs183582247	intron_variant	MODIFIER
chr10_94770047_C_T	2	*1/*37;*1/*17	rs61886221	intron_variant	MODIFIER
chr10_94772496_G_A	2	*2/*37;*1/*2	rs184439973	intron_variant	MODIFIER
chr10_94772895_C_A	2	*2/*37;*1/*2	rs181924249	intron_variant	MODIFIER
chr10_94773246_C_T	2	*1/*1;*1/*2	rs112180154	intron_variant	MODIFIER
chr10_94774021_G_A	2	*1/*37;*1/*17	rs192728444	intron_variant	MODIFIER
chr10_94774443_T_A	2	*1/*1;*1/*38	rs17885958	intron_variant	MODIFIER
chr10_94776580_T_G	2	*2/*37	rs1271965628	intron_variant	MODIFIER
chr10_94779551_T_TTTTTCTTTTCTTTTCTTTTC	2	*2/*37;*1/*2	rs6144036	intron_variant	MODIFIER
chr10_94785306_T_G	2	*1/*37;*1/*17	rs76199251	intron_variant	MODIFIER
chr10_94787446_G_T	2	*1/*37;*1/*17	rs75580262	intron_variant	MODIFIER
chr10_94787869_C_T	2	*2/*37;*1/*2	rs139523821	intron_variant	MODIFIER
chr10_94787993_C_T	2	*1/*1	rs549133911	intron_variant	MODIFIER
chr10_94791237_G_A	2	*2/*2	rs77739805	intron_variant	MODIFIER
chr10_94797007_G_A	2	*2/*37;*1/*2	rs189268968,COSV64907357	intron_variant	MODIFIER
chr10_94797601_G_T	2	*1/*1;*1/*38	rs1009248349	intron_variant	MODIFIER
chr10_94797706_G_T	2	*2/*2	rs188368393	intron_variant	MODIFIER
chr10_94798814_AT_ATTT	2	*1/*38	chr10_94798814_AT_ATTT	intron_variant	MODIFIER	Novel
chr10_94798814_ATTTT_AT	2	*2/*37;*1/*2	chr10_94798814_ATTTT_AT	intron_variant	MODIFIER	Novel
chr10_94798814_ATTTT_ATTTTTT	2	*1/*2	chr10_94798814_ATTTT_ATTTTTT	intron_variant	MODIFIER	Novel
chr10_94798814_ATTTTT_A	2	*1/*17;*1/*1	rs61240923	intron_variant	MODIFIER
chr10_94801424_G_T	2	*1/*37;*1/*1	rs141932959	intron_variant	MODIFIER
chr10_94804738_G_A	2	*1/*37;*1/*17	rs111892895	intron_variant	MODIFIER
chr10_94805653_G_C	2	*1/*37;*1/*17	rs112790223	intron_variant	MODIFIER
chr10_94806556_CTTG_C	2	*1/*17;*1/*37	rs550413752	intron_variant	MODIFIER
chr10_94806855_G_A	2	*1/*37;*1/*17	rs75665761	intron_variant	MODIFIER
chr10_94811679_A_G	2	*1/*1;*1/*38	rs529949330	intron_variant	MODIFIER
chr10_94812954_G_T	2	*1/*1;*1/*38	rs201406496,COSV64906799	intron_variant	MODIFIER
chr10_94814866_G_A	2	*17/*17;*1/*17	rs560368323	intron_variant	MODIFIER
chr10_94816557_A_T	2	*1/*37;*1/*1	rs147888698	intron_variant	MODIFIER
chr10_94816579_CT_C	2	*1/*37	rs199878684	intron_variant	MODIFIER
chr10_94816645_G_A	2	*1/*37;*1/*17	rs189632703	intron_variant	MODIFIER
chr10_94817298_G_T	2	*1/*1;*1/*37	rs940660913	intron_variant	MODIFIER
chr10_94817415_T_C	2	*2/*37	rs1186648232	intron_variant	MODIFIER
chr10_94817881_C_T	2	*1/*37;*1/*17	rs752848034	intron_variant	MODIFIER
chr10_94818012_CAAA_CA	2	*17/*38	chr10_94818012_CAAA_CA	intron_variant	MODIFIER	Novel
chr10_94818371_G_A	2	*2/*37;*1/*2	rs558614944	intron_variant	MODIFIER
chr10_94818927_A_C	2	*2/*37	rs1262943053	intron_variant	MODIFIER
chr10_94819399_C_T	2	*1/*37;*1/*17	rs536477979	intron_variant	MODIFIER
chr10_94819400_T_A	2	*1/*37;*1/*17	rs556437849	intron_variant	MODIFIER
chr10_94819583_A_T	2	*1/*1;*1/*38	rs1370766494	intron_variant	MODIFIER
chr10_94820048_A_G	2	*1/*38	rs865881749	intron_variant	MODIFIER
chr10_94820871_G_T	2	*1/*1;*1/*2	rs188705974	intron_variant	MODIFIER
chr10_94824918_G_A	2	*2/*37;*1/*37	rs570575649	intron_variant	MODIFIER
chr10_94825106_G_A	2	*1/*1;*1/*2	rs368584435	intron_variant	MODIFIER
chr10_94825204_C_T	2	*2/*37;*1/*2	rs879708074	intron_variant	MODIFIER
chr10_94825291_T_C	2	*1/*17;*17/*17	rs1368355628	intron_variant	MODIFIER
chr10_94826217_G_A	2	*1/*37;*1/*17	rs368221074	intron_variant	MODIFIER
chr10_94827123_C_A	2	*1/*37;*1/*17	rs373331651,COSV64909620	intron_variant	MODIFIER
chr10_94827346_T_C	2	*1/*17;*1/*37	rs537481430	intron_variant	MODIFIER
chr10_94828624_A_C	2	*2/*37;*1/*37	rs12573281	intron_variant	MODIFIER
chr10_94830427_G_A	2	*2/*37;*1/*37	rs1019812325	intron_variant	MODIFIER
chr10_94831606_G_A	2	*1/*38	rs112871075	intron_variant	MODIFIER
chr10_94833016_A_G	2	*2/*37;*1/*2	rs144084647	intron_variant	MODIFIER
chr10_94833453_CT_C	2	*1/*37;*1/*1	rs536982317	intron_variant	MODIFIER
chr10_94834059_A_G	2	*1/*37;*1/*17	rs112446755	intron_variant	MODIFIER
chr10_94834540_G_A	2	*1/*37;*1/*17	rs112030001	intron_variant	MODIFIER
chr10_94836358_C_T	2	*2/*37;*1/*2	rs566134254	intron_variant	MODIFIER
chr10_94836395_T_G	2	*1/*37;*1/*1	rs181597776	intron_variant	MODIFIER
chr10_94837582_G_A	2	*1/*17;*1/*37	rs139109661	intron_variant	MODIFIER
chr10_94837654_G_A	2	*1/*17;*1/*37	rs550199429	intron_variant	MODIFIER
chr10_94839280_AT_A	2	*2/*37;*1/*37	rs1235906217	intron_variant	MODIFIER
chr10_94839364_C_T	2	*17/*17;*1/*17	rs187597953	intron_variant	MODIFIER
chr10_94842393_G_GTT	2	*2/*2	rs57865512	intron_variant	MODIFIER
chr10_94844372_A_C	2	*1/*17;*1/*37	rs180987404	intron_variant	MODIFIER
chr10_94847610_G_A	2	*1/*37;*1/*17	rs145068433,COSV64906881	intron_variant	MODIFIER
chr10_94849716_G_A	2	*1/*37;*1/*17	rs17882222	intron_variant	MODIFIER
chr10_94851262_A_AAGGCTACACACTTTTTTTTTTTTTTTTTTTTTGAGACGGAGTCTCGCTCTGTCGCCCAGTCTGGAGTGCAGTGGCACGATCTCGGCTCACTGCAAGCTCTGCCTCCCGGGTTCACGCCATTCTCCTGCCTCAGCCTCCCGAGCAGCTGGGACTACAGGCGCCCGCCACCACGCCCGGCTAATTTTTTGCATTTTTAGTAGAGACGGGGTTTCACCATGTTAGCCAGGATGGTCTCGATCTCCTGACCTCGTGATCCGCCCGCCTCGGCCTCCCAAAGTGCTGGGATTACAGGCGTGAGCCACCGCGCCCGGCC	2	*1/*17;*17/*17	chr10_94851262_A_AAGGCTACACACTTTTTTTTTTTTTTTTTTTTTGAGACGGAGTCTCGCTCTGTCGCCCAGTCTGGAGTGCAGTGGCACGATCTCGGCTCACTGCAAGCTCTGCCTCCCGGGTTCACGCCATTCTCCTGCCTCAGCCTCCCGAGCAGCTGGGACTACAGGCGCCCGCCACCACGCCCGGCTAATTTTTTGCATTTTTAGTAGAGACGGGGTTTCACCATGTTAGCCAGGATGGTCTCGATCTCCTGACCTCGTGATCCGCCCGCCTCGGCCTCCCAAAGTGCTGGGATTACAGGCGTGAGCCACCGCGCCCGGCC	intron_variant	MODIFIER	Novel
chr10_94853547_C_CTTT	2	*2/*2	rs34415420	3_prime_UTR_variant	MODIFIER
chr10_94763447_G_T	1	*1/*37	rs528461267	intron_variant	MODIFIER
chr10_94764676_G_T	1	*2/*37	rs191918906	intron_variant	MODIFIER
chr10_94765423_T_C	1	*1/*1	rs117442884	intron_variant	MODIFIER
chr10_94765765_G_A	1	*1/*2	rs184528353	intron_variant	MODIFIER
chr10_94768774_G_T	1	*1/*38	rs116992754	intron_variant	MODIFIER
chr10_94769224_G_T	1	*17/*37	chr10_94769224_G_T	intron_variant	MODIFIER	Novel
chr10_94769885_T_A	1	*1/*1	rs1328564831	intron_variant	MODIFIER
chr10_94769931_G_A	1	*1/*1	rs149121801	intron_variant	MODIFIER
chr10_94770813_G_C	1	*1/*37	chr10_94770813_G_C	intron_variant	MODIFIER	Novel
chr10_94771679_A_C	1	*2/*37	rs188557290	intron_variant	MODIFIER
chr10_94772268_A_G	1	*17/*37	rs910320092	intron_variant	MODIFIER
chr10_94772570_T_C	1	*17/*37	rs148152060	intron_variant	MODIFIER
chr10_94772642_G_A	1	*1/*38	rs927847206	intron_variant	MODIFIER
chr10_94772942_C_T	1	*1/*1	rs552882131	intron_variant	MODIFIER
chr10_94773253_T_G	1	*1/*37	rs574117846	intron_variant	MODIFIER
chr10_94773273_A_G	1	*17/*38	rs533318944	intron_variant	MODIFIER
chr10_94773286_C_T	1	*1/*38	rs546790581	intron_variant	MODIFIER
chr10_94773678_G_A	1	*2/*2	rs144414415	intron_variant	MODIFIER
chr10_94775507_G_A	1	*2/*37	rs58973490,COSV64909501	missense_variant	MODERATE		rs58973490	CYP2C19*2.010;CYP2C19*11;CYP2C19*11.001
chr10_94775981_G_C	1	*1/*17	chr10_94775981_G_C	intron_variant	MODIFIER	Novel
chr10_94778002_C_T	1	*2/*2	rs142786371	intron_variant	MODIFIER
chr10_94779722_G_A	1	*1/*37	rs753696539	intron_variant	MODIFIER
chr10_94781129_A_T	1	*1/*38	rs533341363	intron_variant	MODIFIER
chr10_94782194_A_G	1	*1/*37	rs562491622	intron_variant	MODIFIER
chr10_94782311_G_A	1	*17/*17	rs185074599	intron_variant	MODIFIER
chr10_94782517_G_A	1	*1/*2	rs527601707	intron_variant	MODIFIER
chr10_94783974_C_G	1	*2/*2	rs139198915	intron_variant	MODIFIER
chr10_94784606_A_ATTAT	1	*1/*37	rs576229059	intron_variant	MODIFIER
chr10_94785066_T_C	1	*1/*38	rs185111928	intron_variant	MODIFIER
chr10_94786058_T_A	1	*2/*37	rs190680549	intron_variant	MODIFIER
chr10_94789031_C_T	1	*17/*37	rs1165036356	intron_variant	MODIFIER
chr10_94789766_G_A	1	*17/*17	rs534716698	intron_variant	MODIFIER
chr10_94791775_T_G	1	*17/*38	rs1371309225	intron_variant	MODIFIER
chr10_94792347_G_T	1	*1/*37	rs1029245448	intron_variant	MODIFIER
chr10_94795439_T_C	1	*1/*37	rs1021253417	intron_variant	MODIFIER
chr10_94796654_G_A	1	*1/*1	rs778281658	intron_variant	MODIFIER
chr10_94797418_A_T	1	*17/*17	rs573440896	intron_variant	MODIFIER
chr10_94797524_C_T	1	*1/*37	rs558851965	intron_variant	MODIFIER
chr10_94798164_G_A	1	*17/*37	rs752441962	intron_variant	MODIFIER
chr10_94798814_ATT_A	1	*1/*1	rs61240923	intron_variant	MODIFIER
chr10_94798814_ATT_ATTT	1	*1/*1	chr10_94798814_ATT_ATTT	intron_variant	MODIFIER	Novel
chr10_94798814_ATTTT_A	1	*2/*37	rs61240923	intron_variant	MODIFIER
chr10_94798814_ATTTTT_ATTTTTT	1	*1/*1	chr10_94798814_ATTTTT_ATTTTTT	intron_variant	MODIFIER	Novel
chr10_94798814_ATTTTTT_A	1	*1/*37	rs61240923	intron_variant	MODIFIER
chr10_94798814_ATTTTTT_AT	1	*1/*37	chr10_94798814_ATTTTTT_AT	intron_variant	MODIFIER	Novel
chr10_94799497_G_A	1	*17/*38	rs567328897	intron_variant	MODIFIER
chr10_94800219_T_C	1	*1/*38	rs372355892	intron_variant	MODIFIER
chr10_94801850_G_A	1	*1/*38	rs192331600	intron_variant	MODIFIER
chr10_94801941_T_G	1	*2/*2	rs556188080	intron_variant	MODIFIER
chr10_94804199_T_G	1	*2/*37	rs570166672	intron_variant	MODIFIER
chr10_94804214_G_A	1	*1/*2	rs1255447923	intron_variant	MODIFIER
chr10_94806081_C_A	1	*1/*37	rs147200733	intron_variant	MODIFIER
chr10_94808529_C_T	1	*1/*17	rs556364065	intron_variant	MODIFIER
chr10_94808796_G_A	1	*1/*1	rs183091449	intron_variant	MODIFIER
chr10_94809491_A_G	1	*1/*17	rs181046671	intron_variant	MODIFIER
chr10_94809776_G_C	1	*1/*37	rs149452866	intron_variant	MODIFIER
chr10_94810615_G_A	1	*2/*37	rs190806446	intron_variant	MODIFIER
chr10_94811134_T_C	1	*17/*37	rs947421367	intron_variant	MODIFIER
chr10_94811732_A_G	1	*1/*1	rs546771054	intron_variant	MODIFIER
chr10_94811836_C_A	1	*1/*37	rs1848929795	intron_variant	MODIFIER
chr10_94811938_C_A	1	*1/*1	rs139238766	intron_variant	MODIFIER
chr10_94812627_T_C	1	*2/*37	rs969057487	intron_variant	MODIFIER
chr10_94813283_C_T	1	*1/*2	rs983851356	intron_variant	MODIFIER
chr10_94813316_G_A	1	*2/*2	rs192899672	intron_variant	MODIFIER
chr10_94813701_G_T	1	*1/*17	rs1219093759	intron_variant	MODIFIER
chr10_94814096_A_G	1	*1/*37	rs545724922	intron_variant	MODIFIER
chr10_94814190_G_T	1	*17/*38	rs1403508974	intron_variant	MODIFIER
chr10_94814708_G_T	1	*1/*37	rs879282619	intron_variant	MODIFIER
chr10_94815015_G_A	1	*17/*37	rs3853515	intron_variant	MODIFIER
chr10_94816244_CT_C	1	*1/*37	rs535862340	intron_variant	MODIFIER
chr10_94816579_C_CT	1	*2/*2	rs199878684	intron_variant	MODIFIER
chr10_94816826_G_C	1	*1/*37	rs1193046450	intron_variant	MODIFIER
chr10_94816847_T_C	1	*1/*37	rs1328401850	intron_variant	MODIFIER
chr10_94816975_T_A	1	*17/*37	rs1475680101	intron_variant	MODIFIER
chr10_94817288_A_G	1	*2/*2	rs1432177771	intron_variant	MODIFIER
chr10_94817355_T_C	1	*17/*37	rs917461828	intron_variant	MODIFIER
chr10_94817829_C_T	1	*17/*37	rs1214246616	intron_variant	MODIFIER
chr10_94817929_C_T	1	*2/*2	rs1262828379	intron_variant	MODIFIER
chr10_94817944_C_T	1	*17/*37	rs1421059371	intron_variant	MODIFIER
chr10_94817990_G_A	1	*2/*37	rs1295519601	intron_variant	MODIFIER
chr10_94818317_G_A	1	*1/*17	rs972128786	intron_variant	MODIFIER
chr10_94818356_T_A	1	*1/*1	rs1192720015	intron_variant	MODIFIER
chr10_94818686_CTGTT_C	1	*1/*38	rs770847686	intron_variant	MODIFIER
chr10_94818731_CA_C	1	*1/*37	rs745779072	intron_variant	MODIFIER
chr10_94818751_A_T	1	*1/*1	rs556474990	intron_variant	MODIFIER
chr10_94819285_C_G	1	*1/*38	rs1488566862	intron_variant	MODIFIER
chr10_94819441_G_A	1	*1/*2	rs1160757860	intron_variant	MODIFIER
chr10_94819454_G_T	1	*1/*1	rs1359023323	intron_variant	MODIFIER
chr10_94819773_G_A	1	*17/*38	rs1849081034	intron_variant	MODIFIER
chr10_94820705_C_G	1	*1/*17	rs1034268102	intron_variant	MODIFIER
chr10_94820821_A_G	1	*1/*2	rs1462686598	intron_variant	MODIFIER
chr10_94823472_G_A	1	*17/*17	rs764831530	intron_variant	MODIFIER
chr10_94824743_T_G	1	*1/*38	rs570585956	intron_variant	MODIFIER
chr10_94824747_C_T	1	*1/*1	rs926449234	intron_variant	MODIFIER
chr10_94825929_G_A	1	*1/*38	rs1389665599	intron_variant	MODIFIER
chr10_94826174_G_GT	1	*1/*1	rs769806151	intron_variant	MODIFIER
chr10_94826975_C_T	1	*17/*38	rs555356783	intron_variant	MODIFIER
chr10_94827757_G_T	1	*1/*37	chr10_94827757_G_T	intron_variant	MODIFIER	Novel
chr10_94827761_G_A	1	*1/*2	rs959269139	intron_variant	MODIFIER
chr10_94827995_G_A	1	*1/*37	rs544479878	intron_variant	MODIFIER
chr10_94828015_T_C	1	*17/*37	rs577605627	intron_variant	MODIFIER
chr10_94828135_T_A	1	*1/*2	rs531563274	intron_variant	MODIFIER
chr10_94828235_G_A	1	*37/*37	rs983315135	intron_variant	MODIFIER
chr10_94828380_G_A	1	*1/*37	rs557986724	intron_variant	MODIFIER
chr10_94828990_C_A	1	*1/*38	rs551580078	intron_variant	MODIFIER
chr10_94829002_T_A	1	*1/*38	rs534204511	intron_variant	MODIFIER
chr10_94829024_G_A	1	*1/*38	rs184084521	intron_variant	MODIFIER
chr10_94829032_T_C	1	*1/*38	rs1237984090	intron_variant	MODIFIER
chr10_94829043_A_T	1	*1/*38	rs150336456	intron_variant	MODIFIER
chr10_94829067_C_T	1	*1/*1	rs576616174	intron_variant	MODIFIER
chr10_94829981_AG_A	1	*1/*37	rs879866759	intron_variant	MODIFIER
chr10_94829984_G_T	1	*1/*37	rs951097817	intron_variant	MODIFIER
chr10_94830329_C_A	1	*2/*2	rs76898372	intron_variant	MODIFIER
chr10_94830527_A_G	1	*1/*37	rs1849316924	intron_variant	MODIFIER
chr10_94831006_C_T	1	*1/*38	rs372941882	intron_variant	MODIFIER
chr10_94831216_T_A	1	*1/*1	rs117271207	intron_variant	MODIFIER
chr10_94833787_T_C	1	*1/*37	rs187833913	intron_variant	MODIFIER
chr10_94834290_G_A	1	*2/*2	rs1025404321	intron_variant	MODIFIER
chr10_94834556_C_CT	1	*17/*37	rs75883570	intron_variant	MODIFIER
chr10_94835007_C_T	1	*1/*38	rs1026877871	intron_variant	MODIFIER
chr10_94835400_C_T	1	*1/*1	rs777815784	intron_variant	MODIFIER
chr10_94835957_T_C	1	*1/*37	rs530818758	intron_variant	MODIFIER
chr10_94838225_G_A	1	*1/*38	rs373780078	intron_variant	MODIFIER
chr10_94838434_C_T	1	*2/*2	rs1377804675	intron_variant	MODIFIER
chr10_94838686_G_A	1	*1/*38	rs554597612	intron_variant	MODIFIER
chr10_94839645_A_G	1	*1/*1	rs146454134	intron_variant	MODIFIER
chr10_94839990_A_AT	1	*17/*37	rs113708910	intron_variant	MODIFIER
chr10_94840220_G_A	1	*1/*37	rs114370660	intron_variant	MODIFIER
chr10_94840228_C_CTT	1	*2/*37	rs113238504	intron_variant	MODIFIER
chr10_94841344_A_T	1	*1/*37	rs1240605793	intron_variant	MODIFIER
chr10_94841846_T_C	1	*1/*38	rs773071818	intron_variant	MODIFIER
chr10_94842163_G_A	1	*1/*38	rs72816684	intron_variant	MODIFIER
chr10_94842315_C_CT	1	*1/*37	rs540232530	intron_variant	MODIFIER
chr10_94842895_G_A	1	*17/*37	rs768975477	synonymous_variant	LOW
chr10_94842934_C_T	1	*2/*2	rs17882744	synonymous_variant	LOW		rs17882744	CYP2C19*1.004;CYP2C19*39.001
chr10_94843185_A_T	1	*2/*37	rs151332064	intron_variant	MODIFIER
chr10_94844162_C_G	1	*1/*38	rs764642560	intron_variant	MODIFIER
chr10_94844232_A_G	1	*17/*37	rs892468622	intron_variant	MODIFIER
chr10_94845851_G_A	1	*1/*37	rs544655329	intron_variant	MODIFIER
chr10_94846030_T_C	1	*1/*37	rs144832270	intron_variant	MODIFIER
chr10_94846036_G_C	1	*17/*37	rs184522321	intron_variant	MODIFIER
chr10_94847705_C_G	1	*2/*2	rs192463311	intron_variant	MODIFIER
chr10_94847980_C_G	1	*2/*2	rs529131742	intron_variant	MODIFIER
chr10_94847984_G_T	1	*1/*1	rs561681256	intron_variant	MODIFIER
chr10_94848433_C_T	1	*1/*1	rs563602749	intron_variant	MODIFIER
chr10_94848953_T_C	1	*1/*37	rs932274630	intron_variant	MODIFIER
chr10_94849198_G_C	1	*1/*1	rs1002238653	intron_variant	MODIFIER
chr10_94849253_G_T	1	*1/*2	rs77460241	intron_variant	MODIFIER
chr10_94850203_C_T	1	*17/*37	rs955300432	intron_variant	MODIFIER
chr10_94851262_A_AAGGCTACACACTTTTTTTTTTTTTTTTTTTTGAGACGGAGTCTCGCTCTGTCGCCCAGTCTGGAGTGCAGTGGCACGATCTCGGCTCACTGCAAGCTCTGCCTCCCGGGTTCACGCCATTCTCCTGCCTCAGCCTCCCGAGCAGCTGGGACTACAGGCGCCCGCCACCACGCCCGGCTAATTTTTTGCATTTTTAGTAGAGACGGGGTTTCACCATGTTAGCCAGGATGGTCTCGATCTCCTGACCTCGTGATCCGCCCGCCTCGGCCTCCCAAAGTGCTGGGATTACAGGCGTGAGCCACCGCGCCCGGCC	1	*17/*17	chr10_94851262_A_AAGGCTACACACTTTTTTTTTTTTTTTTTTTTGAGACGGAGTCTCGCTCTGTCGCCCAGTCTGGAGTGCAGTGGCACGATCTCGGCTCACTGCAAGCTCTGCCTCCCGGGTTCACGCCATTCTCCTGCCTCAGCCTCCCGAGCAGCTGGGACTACAGGCGCCCGCCACCACGCCCGGCTAATTTTTTGCATTTTTAGTAGAGACGGGGTTTCACCATGTTAGCCAGGATGGTCTCGATCTCCTGACCTCGTGATCCGCCCGCCTCGGCCTCCCAAAGTGCTGGGATTACAGGCGTGAGCCACCGCGCCCGGCC	intron_variant	MODIFIER	Novel
chr10_94851610_G_A	1	*17/*38	rs1365572462	intron_variant	MODIFIER
chr10_94851659_G_A	1	*2/*37	rs182008783	intron_variant	MODIFIER
chr10_94853089_G_T	1	*1/*37	rs544997836	3_prime_UTR_variant	MODIFIER
chr10_94853610_A_G	1	*1/*2	rs564279939	3_prime_UTR_variant	MODIFIER
chr10_94853668_C_T	1	*2/*2	rs150921324	3_prime_UTR_variant	MODIFIER
chr10_94853835_T_C	1	*17/*38	chr10_94853835_T_C	3_prime_UTR_variant	MODIFIER	Novel
chr10_94854356_T_G	1	*2/*2	rs17882302	3_prime_UTR_variant	MODIFIER
chr10_94855093_T_G	1	*17/*37	chr10_94855093_T_G	3_prime_UTR_variant	MODIFIER	Novel
chr10_94855367_C_G	1	*1/*1	rs111625800	3_prime_UTR_variant	MODIFIER

## Sheet: Supplementary T7
Supplementary Table 7. Linear regression results assessing CYP2C19 diplotype effects on omeprazole metabolic ratios: Models are additionally adjusted for body mass index and CYP2C19 inhibitors.
CYP2C19 genotype model (n=113)	Estimate	Standar error	P-value	CI 2.5 %	CI 97.5 %
CYP2C19 inhibitors	1.13659	0.229284	2.92572e-06	0.687201	1.58598
BMI	0.0343682	0.0111856	0.00273472	0.0124449	0.0562915
*1/*17	-0.892415	0.273598	0.00151492	-1.42866	-0.356172
*1/*2	0.765922	0.258752	0.00384079	0.258779	1.27307
*1/*37	0.460198	0.178906	0.0115729	0.109548	0.810848
*1/*38	0.155844	0.269477	0.564348	-0.372321	0.684008
*17/*17	-0.299954	0.37192	0.421867	-1.0289	0.428995
*17/*37	0.224164	0.215087	0.29983	-0.197398	0.645726
*17/*38	-0.201874	0.377386	0.593888	-0.941537	0.53779
*2/*2	2.86747	0.330976	8.3172e-14	2.21877	3.51617
*2/*37	2.56881	0.240351	3.08972e-18	2.09773	3.03989
*37/*37	2.52168	0.442561	1.2265e-07	1.65427	3.38908
Contrast analysis	P-value
*37/*37 vs *2/*2	0.4983
*2/*37 vs *1/*2	4.744e-09
CYP2C19 NMa diplotype model (n=113)	Estimate	Standar error	P-value	CI 2.5 %	CI 97.5 %
CYP2C19 inhibitors	1.13762	0.230202	3.04313e-06	0.68643	1.5888
BMI	0.0332378	0.0112341	0.0038412	0.0112193	0.0552562
*17/*17	-0.348793	0.363971	0.340177	-1.06216	0.364576
*17/*37	0.174366	0.198937	0.382824	-0.215543	0.564275
*2/*2	2.81834	0.321458	4.30724e-14	2.1883	3.44839
*2/*37	2.51941	0.225662	2.1816e-19	2.07713	2.9617
*37/*37	2.47288	0.436697	1.38088e-07	1.61697	3.32879
NMa/*17	-0.736445	0.233018	0.00207388	-1.19315	-0.279738
NMa/*2	0.713848	0.245729	0.00450344	0.232228	1.19547
NMa/*37	0.411667	0.157975	0.0105341	0.102042	0.721291
Contrast analysis	P-value
NMa/*17 vs *17/*37	0.0003198
*17/*17 vs *17/*37	0.1661

## Sheet: Supplementary T8
Supplementary Table 8. All variants detected by long-read sequencing (n = 112) within the CYP2D6 gene. This comprehensive variant list includes all variants within CYP2D6 gene region (chr22:42,126,499–42,130,865) detected from long-read sequencing.
Variant ID	Nr individuals	Distinct star alleles present in carriers of this variant	rsID	Consequence	Impact	Novel	PharmVar rsID	PharmVar Star Alleles
chr22_42130482_C_A	75	*2/[*13 + *2];*9/*35;*2/*3;*1/*41;*1/*35;*1/*4;*1/[*68 + *4];*1/*2;*2/*2;*41/*124;*2/*35;*1/*1;[*68 + *4]/[*68 + *4];*4/[*68 + *4];*35/*41;*2x2/*4;*2/*5;*4/*4;*2/*33;*2/[*68 + *4];*4/*35;*35/*68x3;*35/*35;*4/*33;*5/*35;*2/*124;*3/*35;*5/[*68 + *4];*35/[*68 + *4]	rs28371699	intron_variant	MODIFIER		rs28371699	CYP2D6*1.006;CYP2D6*1.007;CYP2D6*1.032;CYP2D6*1.039;CYP2D6*1.043;CYP2D6*1.045;CYP2D6*1.046;CYP2D6*1.058;CYP2D6*1.059;CYP2D6*1.065;CYP2D6*2.001;CYP2D6*2.005;CYP2D6*2.010;CYP2D6*2.011;CYP2D6*2.012;CYP2D6*2.013;CYP2D6*2.014;CYP2D6*2.015;CYP2D6*2.016;CYP2D6*2.017;CYP2D6*2.018;CYP2D6*2.019;CYP2D6*2.020;CYP2D6*2.021;CYP2D6*2.022;CYP2D6*2.023;CYP2D6*2.024;CYP2D6*2.025;CYP2D6*2.026;CYP2D6*2.027;CYP2D6*2.…
chr22_42127407_T_G	74	*2/[*13 + *2];*9/*35;*2/*3;*1/*41;*1/*35;*1/*4;*1/[*68 + *4];*1/*2;*2/*2;*41/*124;*2/*35;*1/*1;[*68 + *4]/[*68 + *4];*4/[*68 + *4];*35/*41;*2x2/*4;*2/*5;*4/*4;*2/*33;*2/[*68 + *4];*4/*35;*35/*68x3;*35/*35;*4/*33;*5/*35;*2/*124;*3/*35;*5/[*68 + *4];*35/[*68 + *4]	rs1985842	intron_variant	MODIFIER		rs1985842	CYP2D6*1.040;CYP2D6*1.041;CYP2D6*1.054;CYP2D6*2.001;CYP2D6*2.005;CYP2D6*2.010;CYP2D6*2.011;CYP2D6*2.012;CYP2D6*2.013;CYP2D6*2.014;CYP2D6*2.015;CYP2D6*2.016;CYP2D6*2.017;CYP2D6*2.018;CYP2D6*2.019;CYP2D6*2.020;CYP2D6*2.022;CYP2D6*2.023;CYP2D6*2.025;CYP2D6*2.026;CYP2D6*2.027;CYP2D6*2.028;CYP2D6*2.029;CYP2D6*2.030;CYP2D6*2.031;CYP2D6*2.032;CYP2D6*2.033;CYP2D6*2.034;CYP2D6*4.001;CYP2D6*4.004;CYP2D6*4.…
chr22_42129950_A_C	74	*2/[*13 + *2];*9/*35;*2/*3;*1/*41;*1/*35;*1/*4;*1/[*68 + *4];*1/*2;*2/*2;*41/*124;*2/*35;[*68 + *4]/[*68 + *4];*4/[*68 + *4];*35/*41;*2x2/*4;*2/*5;*4/*4;*2/*33;*2/[*68 + *4];*1/*1;*4/*35;*35/*68x3;*35/*35;*4/*33;*5/*35;*2/*124;*3/*35;*5/[*68 + *4];*35/[*68 + *4]	rs28371702	intron_variant	MODIFIER		rs28371702	CYP2D6*1.006;CYP2D6*1.007;CYP2D6*1.016;CYP2D6*1.032;CYP2D6*1.039;CYP2D6*1.043;CYP2D6*1.045;CYP2D6*1.046;CYP2D6*1.058;CYP2D6*1.059;CYP2D6*1.065;CYP2D6*2.001;CYP2D6*2.005;CYP2D6*2.010;CYP2D6*2.011;CYP2D6*2.012;CYP2D6*2.013;CYP2D6*2.014;CYP2D6*2.015;CYP2D6*2.016;CYP2D6*2.017;CYP2D6*2.018;CYP2D6*2.019;CYP2D6*2.020;CYP2D6*2.021;CYP2D6*2.022;CYP2D6*2.023;CYP2D6*2.024;CYP2D6*2.025;CYP2D6*2.026;CYP2D6*2.…
chr22_42126611_C_G	73	*2/[*13 + *2];*9/*35;*2/*3;*1/*41;*1/*35;*1/*4;*1/[*68 + *4];*1/*2;*2/*2;*41/*124;*2/*35;[*68 + *4]/[*68 + *4];*4/[*68 + *4];*35/*41;*2x2/*4;*2/*5;*4/*4;*2/*33;*2/[*68 + *4];*1/*1;*4/*35;*35/*68x3;*35/*35;*4/*33;*5/*35;*2/*124;*3/*35;*5/[*68 + *4];*35/[*68 + *4]	rs1135840,CM931123	missense_variant	MODERATE		rs1135840	CYP2D6*2;CYP2D6*2.001;CYP2D6*2.002;CYP2D6*2.003;CYP2D6*2.004;CYP2D6*2.005;CYP2D6*2.006;CYP2D6*2.007;CYP2D6*2.008;CYP2D6*2.009;CYP2D6*2.010;CYP2D6*2.011;CYP2D6*2.012;CYP2D6*2.013;CYP2D6*2.014;CYP2D6*2.015;CYP2D6*2.016;CYP2D6*2.017;CYP2D6*2.018;CYP2D6*2.019;CYP2D6*2.020;CYP2D6*2.021;CYP2D6*2.022;CYP2D6*2.023;CYP2D6*2.024;CYP2D6*2.025;CYP2D6*2.026;CYP2D6*2.027;CYP2D6*2.028;CYP2D6*2.029;CYP2D6*2.030;…
chr22_42129130_C_G	73	*2/[*13 + *2];*9/*35;*2/*3;*1/*41;*1/*35;*1/*4;*1/[*68 + *4];*1/*2;*2/*2;*41/*124;*2/*35;*1/*1;[*68 + *4]/[*68 + *4];*4/[*68 + *4];*35/*41;*2x2/*4;*2/*5;*4/*4;*2/*33;*2/[*68 + *4];*4/*35;*35/*68x3;*35/*35;*4/*33;*5/*35;*2/*124;*3/*35;*5/[*68 + *4];*35/[*68 + *4]	rs1058164	intron_variant	MODIFIER		rs1058164	CYP2D6*1.011;CYP2D6*1.065;CYP2D6*2.001;CYP2D6*2.002;CYP2D6*2.003;CYP2D6*2.005;CYP2D6*2.006;CYP2D6*2.007;CYP2D6*2.008;CYP2D6*2.009;CYP2D6*2.010;CYP2D6*2.011;CYP2D6*2.012;CYP2D6*2.013;CYP2D6*2.014;CYP2D6*2.015;CYP2D6*2.016;CYP2D6*2.017;CYP2D6*2.018;CYP2D6*2.019;CYP2D6*2.020;CYP2D6*2.021;CYP2D6*2.022;CYP2D6*2.023;CYP2D6*2.024;CYP2D6*2.025;CYP2D6*2.026;CYP2D6*2.027;CYP2D6*2.028;CYP2D6*2.029;CYP2D6*2.…
chr22_42130047_G_C	73	*2/[*13 + *2];*9/*35;*2/*3;*1/*41;*1/*35;*1/*4;*1/[*68 + *4];*1/*2;*2/*2;*41/*124;*2/*35;[*68 + *4]/[*68 + *4];*4/[*68 + *4];*35/*41;*2x2/*4;*2/*5;*4/*4;*2/*33;*2/[*68 + *4];*1/*1;*4/*35;*35/*68x3;*35/*35;*4/*33;*5/*35;*2/*124;*3/*35;*5/[*68 + *4];*35/[*68 + *4]	rs28371701	intron_variant	MODIFIER		rs28371701	CYP2D6*1.032;CYP2D6*1.054;CYP2D6*1.065;CYP2D6*2.001;CYP2D6*2.005;CYP2D6*2.010;CYP2D6*2.011;CYP2D6*2.012;CYP2D6*2.013;CYP2D6*2.014;CYP2D6*2.015;CYP2D6*2.016;CYP2D6*2.017;CYP2D6*2.018;CYP2D6*2.019;CYP2D6*2.020;CYP2D6*2.021;CYP2D6*2.022;CYP2D6*2.023;CYP2D6*2.024;CYP2D6*2.025;CYP2D6*2.026;CYP2D6*2.027;CYP2D6*2.028;CYP2D6*2.029;CYP2D6*2.030;CYP2D6*2.031;CYP2D6*2.032;CYP2D6*2.033;CYP2D6*2.034;CYP2D6*4.…
chr22_42130565_A_G	49	*2/[*13 + *2];*9/*35;*2/*3;*1/*41;*1/*35;*1/*2;*2/*2;*41/*124;*2/*35;*1/*1;*35/*41;*2x2/*4;*2/*5;*2/*33;*2/[*68 + *4];*4/*35;*35/*68x3;*35/*35;*5/*35;*2/*124;*3/*35;*35/[*68 + *4]	rs1080998	intron_variant	MODIFIER		rs1080998	CYP2D6*1.032;CYP2D6*1.040;CYP2D6*1.065;CYP2D6*2.001;CYP2D6*2.005;CYP2D6*2.011;CYP2D6*2.012;CYP2D6*2.013;CYP2D6*2.017;CYP2D6*2.018;CYP2D6*2.019;CYP2D6*2.020;CYP2D6*2.021;CYP2D6*2.022;CYP2D6*2.023;CYP2D6*2.024;CYP2D6*2.027;CYP2D6*2.028;CYP2D6*2.030;CYP2D6*2.033;CYP2D6*2.034;CYP2D6*11.001;CYP2D6*14.001;CYP2D6*15.003;CYP2D6*17.001;CYP2D6*17.002;CYP2D6*17.003;CYP2D6*17.004;CYP2D6*17.005;CYP2D6*17.006;…
chr22_42127207_C_T	48	*2/[*13 + *2];*9/*35;*2/*3;*1/*41;*1/*35;*1/*2;*2/*2;*41/*124;*2/*35;*1/*1;*35/*41;*2x2/*4;*2/*5;*2/*33;*2/[*68 + *4];*4/*35;*35/*68x3;*35/*35;*5/*35;*2/*124;*3/*35;*35/[*68 + *4]	rs28371730	intron_variant	MODIFIER		rs28371730	CYP2D6*3;CYP2D6*3.001;CYP2D6*3.002;CYP2D6*3.003
chr22_42127941_G_A	48	*2/[*13 + *2];*9/*35;*2/*3;*1/*41;*1/*35;*1/*2;*2/*2;*41/*124;*2/*35;*1/*1;*35/*41;*2x2/*4;*2/*5;*2/*33;*2/[*68 + *4];*4/*35;*35/*68x3;*35/*35;*5/*35;*2/*124;*3/*35;*35/[*68 + *4]	rs16947,CM930187	missense_variant	MODERATE		rs16947	CYP2D6*2;CYP2D6*2.001;CYP2D6*2.002;CYP2D6*2.003;CYP2D6*2.004;CYP2D6*2.005;CYP2D6*2.006;CYP2D6*2.007;CYP2D6*2.008;CYP2D6*2.009;CYP2D6*2.010;CYP2D6*2.011;CYP2D6*2.012;CYP2D6*2.013;CYP2D6*2.014;CYP2D6*2.015;CYP2D6*2.016;CYP2D6*2.017;CYP2D6*2.018;CYP2D6*2.019;CYP2D6*2.020;CYP2D6*2.021;CYP2D6*2.022;CYP2D6*2.023;CYP2D6*2.024;CYP2D6*2.025;CYP2D6*2.026;CYP2D6*2.027;CYP2D6*2.028;CYP2D6*2.029;CYP2D6*2.030;…
chr22_42127001_G_A	47	*2/[*13 + *2];*9/*35;*2/*3;*1/*41;*1/*35;*1/*2;*2/*2;*41/*124;*2/*35;*35/*41;*2x2/*4;*2/*5;*2/*33;*2/[*68 + *4];*4/*35;*35/*68x3;*35/*35;*5/*35;*2/*124;*3/*35;*35/[*68 + *4]	rs4987144	splice_polypyrimidine_tract_variant&intron_variant	LOW		rs4987144	CYP2D6*9;CYP2D6*9.001;CYP2D6*9.002;CYP2D6*109;CYP2D6*109.001;CYP2D6*115;CYP2D6*115.001
chr22_42130571_G_T	47	*2/[*13 + *2];*9/*35;*2/*3;*1/*41;*1/*35;*1/*2;*2/*2;*41/*124;*2/*35;*35/*41;*2x2/*4;*2/*5;*2/*33;*2/[*68 + *4];*4/*35;*35/*68x3;*35/*35;*5/*35;*2/*124;*3/*35;*35/[*68 + *4]	rs1080996	intron_variant	MODIFIER		rs1080996	CYP2D6*1.032;CYP2D6*1.040;CYP2D6*1.065;CYP2D6*2.001;CYP2D6*2.005;CYP2D6*2.011;CYP2D6*2.012;CYP2D6*2.013;CYP2D6*2.017;CYP2D6*2.018;CYP2D6*2.019;CYP2D6*2.020;CYP2D6*2.021;CYP2D6*2.022;CYP2D6*2.023;CYP2D6*2.024;CYP2D6*2.027;CYP2D6*2.028;CYP2D6*2.030;CYP2D6*2.033;CYP2D6*2.034;CYP2D6*11.001;CYP2D6*14.001;CYP2D6*15.003;CYP2D6*17.001;CYP2D6*17.002;CYP2D6*17.003;CYP2D6*17.004;CYP2D6*17.005;CYP2D6*17.006;…
chr22_42130578_C_G	47	*2/[*13 + *2];*9/*35;*2/*3;*1/*41;*1/*35;*1/*2;*2/*2;*41/*124;*2/*35;*35/*41;*2x2/*4;*2/*5;*2/*33;*2/[*68 + *4];*4/*35;*35/*68x3;*35/*35;*5/*35;*2/*124;*3/*35;*35/[*68 + *4]	rs1080995	intron_variant	MODIFIER		rs1080995	CYP2D6*1.032;CYP2D6*1.040;CYP2D6*1.065;CYP2D6*2.001;CYP2D6*2.005;CYP2D6*2.011;CYP2D6*2.012;CYP2D6*2.013;CYP2D6*2.017;CYP2D6*2.018;CYP2D6*2.019;CYP2D6*2.020;CYP2D6*2.021;CYP2D6*2.022;CYP2D6*2.023;CYP2D6*2.024;CYP2D6*2.027;CYP2D6*2.028;CYP2D6*2.030;CYP2D6*2.033;CYP2D6*2.034;CYP2D6*11.001;CYP2D6*14.001;CYP2D6*15.003;CYP2D6*17.001;CYP2D6*17.002;CYP2D6*17.003;CYP2D6*17.004;CYP2D6*17.005;CYP2D6*17.006;…
chr22_42130547_T_C	46	*2/[*13 + *2];*9/*35;*2/*3;*1/*41;*1/*35;*1/*2;*2/*2;*41/*124;*2/*35;*35/*41;*2x2/*4;*2/*5;*2/*33;*2/[*68 + *4];*4/*35;*35/*68x3;*35/*35;*5/*35;*2/*124;*3/*35;*35/[*68 + *4]	rs1081000	intron_variant	MODIFIER		rs1081000	CYP2D6*1.032;CYP2D6*1.040;CYP2D6*1.065;CYP2D6*2.001;CYP2D6*2.005;CYP2D6*2.011;CYP2D6*2.012;CYP2D6*2.013;CYP2D6*2.017;CYP2D6*2.018;CYP2D6*2.019;CYP2D6*2.020;CYP2D6*2.021;CYP2D6*2.022;CYP2D6*2.023;CYP2D6*2.024;CYP2D6*2.027;CYP2D6*2.028;CYP2D6*2.030;CYP2D6*2.033;CYP2D6*2.034;CYP2D6*11.001;CYP2D6*14.001;CYP2D6*15.003;CYP2D6*17.001;CYP2D6*17.002;CYP2D6*17.003;CYP2D6*17.004;CYP2D6*17.005;CYP2D6*17.006;…
chr22_42130569_G_C	46	*2/[*13 + *2];*9/*35;*2/*3;*1/*41;*1/*35;*1/*2;*2/*2;*41/*124;*2/*35;*35/*41;*2x2/*4;*2/*5;*2/*33;*2/[*68 + *4];*4/*35;*35/*68x3;*35/*35;*5/*35;*2/*124;*3/*35;*35/[*68 + *4]	rs1080997	intron_variant	MODIFIER		rs1080997	CYP2D6*1.032;CYP2D6*1.040;CYP2D6*1.065;CYP2D6*2.001;CYP2D6*2.005;CYP2D6*2.011;CYP2D6*2.012;CYP2D6*2.013;CYP2D6*2.017;CYP2D6*2.018;CYP2D6*2.019;CYP2D6*2.020;CYP2D6*2.021;CYP2D6*2.022;CYP2D6*2.023;CYP2D6*2.024;CYP2D6*2.027;CYP2D6*2.028;CYP2D6*2.030;CYP2D6*2.033;CYP2D6*2.034;CYP2D6*11.001;CYP2D6*14.001;CYP2D6*15.003;CYP2D6*17.001;CYP2D6*17.002;CYP2D6*17.003;CYP2D6*17.004;CYP2D6*17.005;CYP2D6*17.006;…
chr22_42130559_T_G	45	*2/[*13 + *2];*9/*35;*2/*3;*1/*41;*1/*35;*1/*2;*2/*2;*41/*124;*2/*35;*35/*41;*2x2/*4;*2/*5;*2/*33;*4/*35;*35/*68x3;*35/*35;*5/*35;*2/*124;*3/*35;*35/[*68 + *4]	rs28695233	intron_variant	MODIFIER		rs28695233	CYP2D6*1.032;CYP2D6*1.040;CYP2D6*1.065;CYP2D6*2.001;CYP2D6*2.005;CYP2D6*2.011;CYP2D6*2.012;CYP2D6*2.013;CYP2D6*2.017;CYP2D6*2.018;CYP2D6*2.019;CYP2D6*2.020;CYP2D6*2.021;CYP2D6*2.022;CYP2D6*2.023;CYP2D6*2.024;CYP2D6*2.027;CYP2D6*2.028;CYP2D6*2.030;CYP2D6*2.033;CYP2D6*2.034;CYP2D6*11.001;CYP2D6*14.001;CYP2D6*15.003;CYP2D6*17.001;CYP2D6*17.002;CYP2D6*17.003;CYP2D6*17.004;CYP2D6*17.005;CYP2D6*17.006;…
chr22_42130560_C_G	45	*2/[*13 + *2];*9/*35;*2/*3;*1/*41;*1/*35;*1/*2;*2/*2;*41/*124;*2/*35;*35/*41;*2x2/*4;*2/*5;*2/*33;*4/*35;*35/*68x3;*35/*35;*5/*35;*2/*124;*3/*35;*35/[*68 + *4]	rs29001518	intron_variant	MODIFIER		rs29001518	CYP2D6*1.032;CYP2D6*1.040;CYP2D6*1.065;CYP2D6*2.001;CYP2D6*2.005;CYP2D6*2.011;CYP2D6*2.012;CYP2D6*2.013;CYP2D6*2.017;CYP2D6*2.018;CYP2D6*2.019;CYP2D6*2.020;CYP2D6*2.021;CYP2D6*2.022;CYP2D6*2.023;CYP2D6*2.024;CYP2D6*2.027;CYP2D6*2.028;CYP2D6*2.030;CYP2D6*2.033;CYP2D6*2.034;CYP2D6*11.001;CYP2D6*14.001;CYP2D6*15.003;CYP2D6*17.001;CYP2D6*17.002;CYP2D6*17.003;CYP2D6*17.004;CYP2D6*17.005;CYP2D6*17.006;…
chr22_42127209_T_C	35	*1/*4;*1/[*68 + *4];[*68 + *4]/[*68 + *4];*4/[*68 + *4];*2x2/*4;*4/*4;*2/[*68 + *4];*1/*1;*4/*35;*35/*68x3;*4/*33;*5/[*68 + *4];*35/[*68 + *4]	rs2004511,COSV62245063	intron_variant	MODIFIER		rs2004511	CYP2D6*4.030
chr22_42128694_T_C	35	*1/*4;*1/[*68 + *4];[*68 + *4]/[*68 + *4];*4/[*68 + *4];*2x2/*4;*4/*4;*2/[*68 + *4];*1/*1;*4/*35;*35/*68x3;*4/*33;*5/[*68 + *4];*35/[*68 + *4]	rs2267447	intron_variant	MODIFIER		rs2267447	CYP2D6*2.023;CYP2D6*4.001;CYP2D6*4.004;CYP2D6*4.012;CYP2D6*4.013;CYP2D6*4.014;CYP2D6*4.015;CYP2D6*4.016;CYP2D6*4.017;CYP2D6*4.018;CYP2D6*4.019;CYP2D6*4.020;CYP2D6*4.021;CYP2D6*4.022;CYP2D6*4.023;CYP2D6*4.024;CYP2D6*4.025;CYP2D6*4.026;CYP2D6*4.027;CYP2D6*4.028;CYP2D6*4.029;CYP2D6*4.030;CYP2D6*4.031;CYP2D6*4.032;CYP2D6*4.033;CYP2D6*4.035;CYP2D6*10.002;CYP2D6*10.003;CYP2D6*10.004;CYP2D6*10.005;CYP2D…
chr22_42129809_T_C	34	*1/*4;*1/[*68 + *4];[*68 + *4]/[*68 + *4];*4/[*68 + *4];*2x2/*4;*4/*4;*2/[*68 + *4];*1/*1;*4/*35;*35/*68x3;*4/*33;*5/[*68 + *4];*35/[*68 + *4]	rs28371704,CM994690,COSV62242946	missense_variant	MODERATE		rs28371704	CYP2D6*4.001;CYP2D6*4.002;CYP2D6*4.006;CYP2D6*4.007;CYP2D6*4.008;CYP2D6*4.009;CYP2D6*4.012;CYP2D6*4.013;CYP2D6*4.014;CYP2D6*4.015;CYP2D6*4.016;CYP2D6*4.017;CYP2D6*4.018;CYP2D6*4.020;CYP2D6*4.021;CYP2D6*4.022;CYP2D6*4.023;CYP2D6*4.024;CYP2D6*4.025;CYP2D6*4.026;CYP2D6*4.029;CYP2D6*4.030;CYP2D6*4.031;CYP2D6*4.032;CYP2D6*4.033;CYP2D6*82;CYP2D6*82.001;CYP2D6*160;CYP2D6*160.001
chr22_42129819_G_T	34	*1/*4;*1/[*68 + *4];[*68 + *4]/[*68 + *4];*4/[*68 + *4];*2x2/*4;*4/*4;*2/[*68 + *4];*1/*1;*4/*35;*35/*68x3;*4/*33;*5/[*68 + *4];*35/[*68 + *4]	rs28371703,CM994689,COSV62242960	missense_variant	MODERATE		rs28371703	CYP2D6*4.001;CYP2D6*4.002;CYP2D6*4.006;CYP2D6*4.007;CYP2D6*4.008;CYP2D6*4.009;CYP2D6*4.012;CYP2D6*4.013;CYP2D6*4.014;CYP2D6*4.015;CYP2D6*4.016;CYP2D6*4.017;CYP2D6*4.018;CYP2D6*4.020;CYP2D6*4.021;CYP2D6*4.022;CYP2D6*4.023;CYP2D6*4.024;CYP2D6*4.025;CYP2D6*4.026;CYP2D6*4.029;CYP2D6*4.030;CYP2D6*4.031;CYP2D6*4.032;CYP2D6*4.033;CYP2D6*74;CYP2D6*74.001;CYP2D6*82;CYP2D6*82.001;CYP2D6*160;CYP2D6*160.001
chr22_42130692_G_A	34	*1/*4;*1/[*68 + *4];[*68 + *4]/[*68 + *4];*4/[*68 + *4];*2x2/*4;*4/*4;*2/[*68 + *4];*1/*1;*4/*35;*35/*68x3;*5/[*68 + *4];*35/[*68 + *4]	rs1065852,CM900081,COSV62243216	missense_variant	MODERATE		rs1065852	CYP2D6*4.001;CYP2D6*4.002;CYP2D6*4.003;CYP2D6*4.004;CYP2D6*4.005;CYP2D6*4.006;CYP2D6*4.007;CYP2D6*4.008;CYP2D6*4.009;CYP2D6*4.010;CYP2D6*4.011;CYP2D6*4.013;CYP2D6*4.014;CYP2D6*4.015;CYP2D6*4.016;CYP2D6*4.017;CYP2D6*4.018;CYP2D6*4.019;CYP2D6*4.020;CYP2D6*4.021;CYP2D6*4.022;CYP2D6*4.023;CYP2D6*4.024;CYP2D6*4.025;CYP2D6*4.026;CYP2D6*4.027;CYP2D6*4.028;CYP2D6*4.029;CYP2D6*4.030;CYP2D6*4.031;CYP2D6*4.…
chr22_42129796_G_C	33	*1/*4;*1/[*68 + *4];[*68 + *4]/[*68 + *4];*4/[*68 + *4];*2x2/*4;*4/*4;*2/[*68 + *4];*1/*1;*4/*35;*35/*68x3;*4/*33;*5/[*68 + *4];*35/[*68 + *4]	rs28371705	synonymous_variant	LOW		rs28371705	CYP2D6*2.005;CYP2D6*4.001;CYP2D6*4.002;CYP2D6*4.006;CYP2D6*4.007;CYP2D6*4.008;CYP2D6*4.009;CYP2D6*4.011;CYP2D6*4.012;CYP2D6*4.013;CYP2D6*4.014;CYP2D6*4.015;CYP2D6*4.016;CYP2D6*4.017;CYP2D6*4.018;CYP2D6*4.020;CYP2D6*4.021;CYP2D6*4.022;CYP2D6*4.023;CYP2D6*4.024;CYP2D6*4.025;CYP2D6*4.026;CYP2D6*4.029;CYP2D6*4.030;CYP2D6*4.031;CYP2D6*4.032;CYP2D6*4.033;CYP2D6*82.001
chr22_42128945_C_T	29	*1/*4;*1/[*68 + *4];[*68 + *4]/[*68 + *4];*4/[*68 + *4];*2x2/*4;*4/*4;*1/*1;*4/*35;*4/*33;*5/[*68 + *4];*35/[*68 + *4]	rs3892097,COSV62243440,CS900241	splice_acceptor_variant	HIGH		rs3892097	CYP2D6*4;CYP2D6*4.001;CYP2D6*4.002;CYP2D6*4.003;CYP2D6*4.004;CYP2D6*4.005;CYP2D6*4.006;CYP2D6*4.007;CYP2D6*4.008;CYP2D6*4.009;CYP2D6*4.010;CYP2D6*4.011;CYP2D6*4.012;CYP2D6*4.013;CYP2D6*4.014;CYP2D6*4.015;CYP2D6*4.016;CYP2D6*4.017;CYP2D6*4.018;CYP2D6*4.019;CYP2D6*4.020;CYP2D6*4.021;CYP2D6*4.022;CYP2D6*4.023;CYP2D6*4.024;CYP2D6*4.025;CYP2D6*4.026;CYP2D6*4.027;CYP2D6*4.028;CYP2D6*4.029;CYP2D6*4.030;…
chr22_42130761_C_T	22	*9/*35;*1/*35;*2/*35;*1/*1;*35/*41;*4/*35;*35/*68x3;*35/*35;*5/*35;*3/*35;*35/[*68 + *4]	rs769258,CM033368,COSV62244550	missense_variant	MODERATE		rs769258	CYP2D6*35;CYP2D6*35.001;CYP2D6*35.002;CYP2D6*35.003;CYP2D6*35.004;CYP2D6*35.005;CYP2D6*35.006;CYP2D6*35.007;CYP2D6*143;CYP2D6*143.001;CYP2D6*172;CYP2D6*172.001;CYP2D6*175;CYP2D6*175.001
chr22_42129623_C_T	15	*1/*41;*1/*2;*1/*5;*1/*1	rs1081004	intron_variant	MODIFIER		rs1081004	CYP2D6*1.009;CYP2D6*1.012;CYP2D6*1.013;CYP2D6*1.014;CYP2D6*1.015;CYP2D6*1.016;CYP2D6*1.061;CYP2D6*15.001;CYP2D6*22.001;CYP2D6*118.001
chr22_42127356_G_T	11	*1/*4;*4/*35;*4/*33;*4/*4;*4/[*68 + *4]	rs28371729	intron_variant	MODIFIER		rs28371729	CYP2D6*150;CYP2D6*150.001;CYP2D6*150.002
chr22_42128308_C_A	7	*2/*33;*1/*33;*4/*33	rs28371717,COSV62244303	missense_variant	MODERATE		rs28371717	CYP2D6*33;CYP2D6*33.001;CYP2D6*33.002
chr22_42128216_G_T	6	[*68 + *4]/[*68 + *4];*4/[*68 + *4];*35/*68x3;*1/*2;*5/[*68 + *4]	rs28371718,COSV104666744	synonymous_variant	LOW		rs28371718	CYP2D6*1.004;CYP2D6*1.047;CYP2D6*2.007;CYP2D6*2.025;CYP2D6*2.026;CYP2D6*2.028;CYP2D6*12.002;CYP2D6*45.001;CYP2D6*45.002;CYP2D6*45.003;CYP2D6*45.004;CYP2D6*46.001;CYP2D6*46.002;CYP2D6*46.003;CYP2D6*146.001
chr22_42130522_G_A	6	*1/*4;*1/*1;*1/*2	rs29001678	intron_variant	MODIFIER		rs29001678	CYP2D6*1.018;CYP2D6*1.020;CYP2D6*1.021;CYP2D6*1.022;CYP2D6*1.023;CYP2D6*1.031;CYP2D6*2.017;CYP2D6*15.003;CYP2D6*127.001
chr22_42127803_C_T	5	*1/*41;*41/*124;*35/*41	rs28371725,COSV62244295,CS045903	intron_variant	MODIFIER		rs28371725	CYP2D6*32;CYP2D6*32.001;CYP2D6*41;CYP2D6*41.001;CYP2D6*41.002;CYP2D6*41.003;CYP2D6*41.004;CYP2D6*41.005;CYP2D6*41.006;CYP2D6*41.007;CYP2D6*69;CYP2D6*69.001;CYP2D6*91;CYP2D6*91.001;CYP2D6*119;CYP2D6*119.001;CYP2D6*123;CYP2D6*123.001;CYP2D6*138;CYP2D6*138.001;CYP2D6*158;CYP2D6*158.001
chr22_42128542_T_C	5	[*68 + *4]/[*68 + *4];*4/[*68 + *4];*35/*68x3;*5/[*68 + *4]	rs1291006006	intron_variant	MODIFIER
chr22_42128980_C_T	5	[*68 + *4]/[*68 + *4];*4/[*68 + *4];*35/*68x3;*5/[*68 + *4]	rs113678157,COSV62243279	intron_variant	MODIFIER
chr22_42129008_T_G	5	[*68 + *4]/[*68 + *4];*4/[*68 + *4];*35/*68x3;*5/[*68 + *4]	rs200002499	intron_variant	MODIFIER		rs200002499	CYP2D6*35.007;CYP2D6*121.001;CYP2D6*146.001
chr22_42129036_A_C	5	[*68 + *4]/[*68 + *4];*4/[*68 + *4];*35/*68x3;*5/[*68 + *4]	rs1135826,COSV62245215	intron_variant	MODIFIER		rs1135826	CYP2D6*121;CYP2D6*121.001
chr22_42129037_G_T	5	[*68 + *4]/[*68 + *4];*4/[*68 + *4];*35/*68x3;*5/[*68 + *4]	rs1135825,COSV62245219	intron_variant	MODIFIER		rs1135825	CYP2D6*121;CYP2D6*121.001
chr22_42127526_C_T	4	[*68 + *4]/[*68 + *4];*35/*68x3;*4/[*68 + *4];*5/[*68 + *4]	rs1058172,COSV62242932	missense_variant	MODERATE		rs1058172	CYP2D6*4.021;CYP2D6*127;CYP2D6*127.001;CYP2D6*139;CYP2D6*139.001
chr22_42128071_C_G	4	*1/*1;*1/*2	rs187203531	intron_variant	MODIFIER		rs187203531	CYP2D6*1.034
chr22_42128130_C_T	4	[*68 + *4]/[*68 + *4];*35/*68x3;*4/[*68 + *4];*5/[*68 + *4]	rs28371721	intron_variant	MODIFIER		rs28371721	CYP2D6*2.012;CYP2D6*2.023;CYP2D6*2.034;CYP2D6*12.002;CYP2D6*45.001;CYP2D6*45.002;CYP2D6*45.003;CYP2D6*45.004;CYP2D6*46.001;CYP2D6*46.002;CYP2D6*46.003
chr22_42128185_C_T	4	[*68 + *4]/[*68 + *4];*35/*68x3;*4/[*68 + *4];*5/[*68 + *4]	rs77913725	missense_variant	MODERATE		rs77913725	CYP2D6*81;CYP2D6*81.001;CYP2D6*86;CYP2D6*86.001
chr22_42128433_T_A	4	[*68 + *4]/[*68 + *4];*35/*68x3;*4/[*68 + *4];*5/[*68 + *4]	rs749867663,COSV62245670	intron_variant	MODIFIER		rs749867663	CYP2D6*15.002
chr22_42128500_C_CCT	4	[*68 + *4]/[*68 + *4];*35/*68x3;*4/[*68 + *4];*5/[*68 + *4]	rs745375479	intron_variant	MODIFIER
chr22_42128543_G_A	4	[*68 + *4]/[*68 + *4];*35/*68x3;*4/[*68 + *4];*5/[*68 + *4]	rs1413358805	intron_variant	MODIFIER
chr22_42128550_AT_A	4	[*68 + *4]/[*68 + *4];*35/*68x3;*4/[*68 + *4];*5/[*68 + *4]	rs1454767586	intron_variant	MODIFIER
chr22_42128555_A_G	4	[*68 + *4]/[*68 + *4];*35/*68x3;*4/[*68 + *4];*5/[*68 + *4]	rs1388913350	intron_variant	MODIFIER
chr22_42129042_T_C	4	[*68 + *4]/[*68 + *4];*35/*68x3;*4/[*68 + *4];*5/[*68 + *4]	rs1135824,COSV62243047	intron_variant	MODIFIER		rs1135824	CYP2D6*3.002;CYP2D6*103;CYP2D6*103.001;CYP2D6*121;CYP2D6*121.001
chr22_42126617_AG_A	3	*35/*68x3;*4/[*68 + *4];*5/[*68 + *4]	rs200304972	frameshift_variant	HIGH
chr22_42126980_TGA_T	3	*41/*124;*2/*124	rs757396767	frameshift_variant	HIGH	recruited as novel LoF	rs757396767	CYP2D6*124;CYP2D6*124.001;CYP2D6*124.002
chr22_42128001_C_G	3	*35/*68x3;*4/[*68 + *4];*5/[*68 + *4]	rs768552222	intron_variant	MODIFIER
chr22_42128007_C_CAG	3	*35/*68x3;*4/[*68 + *4];*5/[*68 + *4]	rs1018496392	intron_variant	MODIFIER
chr22_42128173_CCTT_C	3	*9/*35;*1/*9	rs5030656	inframe_deletion&splice_region_variant	MODERATE		rs5030656	CYP2D6*9;CYP2D6*9.001;CYP2D6*9.002;CYP2D6*109;CYP2D6*109.001;CYP2D6*115;CYP2D6*115.001
chr22_42128181_A_T	3	[*68 + *4]/[*68 + *4];*35/*68x3;*4/[*68 + *4]	rs1135828	missense_variant	MODERATE		rs1135828	CYP2D6*81;CYP2D6*81.001;CYP2D6*86;CYP2D6*86.001;CYP2D6*176;CYP2D6*176.001
chr22_42128241_CT_C	3	*2/*3;*1/*3;*3/*35	rs35742686,CD900279,COSV62243816	frameshift_variant	HIGH		rs35742686	CYP2D6*3;CYP2D6*3.001;CYP2D6*3.002;CYP2D6*3.003
chr22_42128321_A_G	3	[*68 + *4]/[*68 + *4];*35/*68x3;*4/[*68 + *4]	rs17002852,COSV62245390	synonymous_variant	LOW		rs17002852	CYP2D6*2.003;CYP2D6*2.007;CYP2D6*41.002;CYP2D6*131.001;CYP2D6*149.001
chr22_42128399_C_T	3	[*68 + *4]/[*68 + *4];*35/*68x3;*5/[*68 + *4]	rs879014378	intron_variant	MODIFIER		rs879014378	CYP2D6*4.031
chr22_42128406_A_C	3	[*68 + *4]/[*68 + *4];*35/*68x3;*5/[*68 + *4]	rs867349751,COSV100637333	intron_variant	MODIFIER		rs867349751	CYP2D6*4.031
chr22_42128552_A_C	3	[*68 + *4]/[*68 + *4];*35/*68x3;*4/[*68 + *4]	rs915922776	intron_variant	MODIFIER
chr22_42128706_T_C	3	[*68 + *4]/[*68 + *4];*35/*68x3;*5/[*68 + *4]	rs111564371,COSV62243387	intron_variant	MODIFIER		rs111564371	CYP2D6*139.001
chr22_42128711_C_G	3	[*68 + *4]/[*68 + *4];*35/*68x3;*5/[*68 + *4]	rs112568578,COSV62245461	intron_variant	MODIFIER		rs112568578	CYP2D6*139.001
chr22_42128793_A_G	3	[*68 + *4]/[*68 + *4];*35/*68x3;*5/[*68 + *4]	rs28371713,COSV62242916	synonymous_variant	LOW		rs28371713	CYP2D6*1.055;CYP2D6*1.061;CYP2D6*2.023;CYP2D6*139.001
chr22_42128812_A_G	3	*35/*68x3;*4/[*68 + *4];*5/[*68 + *4]	rs199535154,CM994691,COSV62244685	missense_variant	MODERATE		rs199535154	CYP2D6*20;CYP2D6*20.001;CYP2D6*150;CYP2D6*150.001;CYP2D6*150.002
chr22_42126548_G_A	2	[*68 + *4]/[*68 + *4];*35/*68x3	rs201759814,COSV62243459	downstream_gene_variant	MODIFIER		rs201759814	CYP2D6*4.016;CYP2D6*4.031
chr22_42126663_G_C	2	*35/*68x3;*4/[*68 + *4]	rs1135833,COSV62243555	missense_variant	MODERATE		rs1135833	CYP2D6*4.013;CYP2D6*4.031;CYP2D6*36;CYP2D6*36.001;CYP2D6*36.002;CYP2D6*36.003;CYP2D6*36.004;CYP2D6*36.005;CYP2D6*83;CYP2D6*83.001;CYP2D6*83.002;CYP2D6*83.003;CYP2D6*141;CYP2D6*141.001
chr22_42126667_C_G	2	*35/*68x3;*4/[*68 + *4]	rs1135832,COSV100637356	synonymous_variant	LOW		rs1135832	CYP2D6*4.013;CYP2D6*4.031;CYP2D6*36;CYP2D6*36.001;CYP2D6*36.002;CYP2D6*36.003;CYP2D6*36.004;CYP2D6*36.005;CYP2D6*83;CYP2D6*83.001;CYP2D6*83.002;CYP2D6*83.003;CYP2D6*141;CYP2D6*141.001
chr22_42127634_C_A	2	[*68 + *4]/[*68 + *4];*35/*68x3	rs3915951,COSV62242939	missense_variant&splice_region_variant	MODERATE		rs3915951	CYP2D6*177;CYP2D6*177.001
chr22_42127887_G_T	2	*1/*1	chr22_42127887_G_T	missense_variant	MODERATE	Novel
chr22_42128325_A_G	2	[*68 + *4]/[*68 + *4];*35/*68x3	rs17002853,CM1612887	missense_variant	MODERATE		rs17002853	CYP2D6*131;CYP2D6*131.001
chr22_42128367_G_C	2	[*68 + *4]/[*68 + *4];*35/*68x3	rs79331140	splice_polypyrimidine_tract_variant&intron_variant	LOW		rs79331140	CYP2D6*4.031
chr22_42128380_C_T	2	[*68 + *4]/[*68 + *4];*35/*68x3	rs77593160	intron_variant	MODIFIER		rs77593160	CYP2D6*4.031
chr22_42128741_G_A	2	[*68 + *4]/[*68 + *4];*35/*68x3	rs113889384	intron_variant	MODIFIER		rs113889384	CYP2D6*1.035;CYP2D6*139.001
chr22_42128760_ACTCCTCGGT_A	2	[*68 + *4]/[*68 + *4];*35/*68x3	rs1257757211	intron_variant	MODIFIER		rs1257757211	CYP2D6*4.030
chr22_42128774_C_T	2	*35/*68x3;*5/[*68 + *4]	rs368129875	intron_variant	MODIFIER		rs368129875	CYP2D6*4.030
chr22_42128813_G_A	2	*35/*68x3;*5/[*68 + *4]	rs150163869,COSV100637429	synonymous_variant	LOW		rs150163869	CYP2D6*1.003;CYP2D6*20;CYP2D6*20.001;CYP2D6*124.002;CYP2D6*150;CYP2D6*150.001;CYP2D6*150.002
chr22_42126633_C_G	1	*35/*68x3	rs1135837	missense_variant	MODERATE		rs1135837	CYP2D6*4.013;CYP2D6*4.031;CYP2D6*36;CYP2D6*36.001;CYP2D6*36.002;CYP2D6*36.003;CYP2D6*36.004;CYP2D6*36.005;CYP2D6*83;CYP2D6*83.001;CYP2D6*83.002;CYP2D6*83.003;CYP2D6*141;CYP2D6*141.001
chr22_42126636_G_A	1	*35/*68x3	rs28371735	missense_variant	MODERATE		rs28371735	CYP2D6*4.013;CYP2D6*4.031;CYP2D6*36;CYP2D6*36.001;CYP2D6*36.002;CYP2D6*36.003;CYP2D6*36.004;CYP2D6*36.005;CYP2D6*83;CYP2D6*83.001;CYP2D6*83.002;CYP2D6*83.003;CYP2D6*141;CYP2D6*141.001
chr22_42126658_A_G	1	*35/*68x3	rs1135836	synonymous_variant	LOW		rs1135836	CYP2D6*4.013;CYP2D6*4.031;CYP2D6*36;CYP2D6*36.001;CYP2D6*36.002;CYP2D6*36.003;CYP2D6*36.004;CYP2D6*36.005;CYP2D6*83;CYP2D6*83.001;CYP2D6*83.002;CYP2D6*83.003;CYP2D6*141;CYP2D6*141.001
chr22_42126660_T_C	1	*35/*68x3	rs1135835	missense_variant	MODERATE		rs1135835	CYP2D6*4.013;CYP2D6*4.031;CYP2D6*36;CYP2D6*36.001;CYP2D6*36.002;CYP2D6*36.003;CYP2D6*36.004;CYP2D6*36.005;CYP2D6*83;CYP2D6*83.001;CYP2D6*83.002;CYP2D6*83.003;CYP2D6*141;CYP2D6*141.001
chr22_42127398_A_G	1	*1/*4	rs28578778	intron_variant	MODIFIER		rs28578778	CYP2D6*4.019
chr22_42127707_A_G	1	*35/*68x3	rs1931164842	intron_variant	MODIFIER
chr22_42127824_T_G	1	*35/*68x3	rs1602570291	intron_variant	MODIFIER
chr22_42127825_T_G	1	*35/*68x3	chr22_42127825_T_G	intron_variant	MODIFIER	Novel
chr22_42127855_A_G	1	*35/*68x3	rs28371724	synonymous_variant	LOW
chr22_42127895_G_A	1	*35/*68x3	rs1135830,COSV62244767	missense_variant	MODERATE
chr22_42127916_G_A	1	*35/*68x3	rs748572154	missense_variant	MODERATE
chr22_42127917_A_G	1	*35/*68x3	rs770674043	missense_variant	MODERATE
chr22_42127926_C_T	1	*35/*68x3	rs1058171	missense_variant	MODERATE
chr22_42127928_G_C	1	*35/*68x3	rs1058170	missense_variant	MODERATE
chr22_42127973_T_C	1	*35/*68x3	rs1135829	missense_variant	MODERATE		rs1135829	CYP2D6*115;CYP2D6*115.001;CYP2D6*132;CYP2D6*132.001
chr22_42128012_C_T	1	*35/*68x3	rs773065145	intron_variant	MODIFIER
chr22_42128771_T_C	1	*35/*68x3	rs1413970459	intron_variant	MODIFIER		rs1413970459	CYP2D6*4.030
chr22_42128818_T_TC	1	*35/*68x3	rs763609904	frameshift_variant	HIGH		rs763609904	CYP2D6*150;CYP2D6*150.001;CYP2D6*150.002
chr22_42129174_C_A	1	*35/*68x3	rs1135823,CM087932,COSV62244641	intron_variant	MODIFIER		rs1135823	CYP2D6*36.004;CYP2D6*53;CYP2D6*53.001
chr22_42129180_A_T	1	*35/*68x3	rs1135822,CM092492,COSV62244165	intron_variant	MODIFIER		rs1135822	CYP2D6*36.004;CYP2D6*49;CYP2D6*49.001;CYP2D6*53;CYP2D6*53.001
chr22_42129754_G_A	1	*1/*4	rs1081003,COSV106062368,COSV62243464	synonymous_variant	LOW		rs1081003	CYP2D6*2.002;CYP2D6*4.004;CYP2D6*4.019;CYP2D6*4.027;CYP2D6*4.028;CYP2D6*4.035;CYP2D6*10.002;CYP2D6*10.003;CYP2D6*10.004;CYP2D6*10.005;CYP2D6*10.006;CYP2D6*10.007;CYP2D6*10.008;CYP2D6*36.001;CYP2D6*36.002;CYP2D6*36.003;CYP2D6*36.004;CYP2D6*36.005;CYP2D6*37.001;CYP2D6*47.001;CYP2D6*49.001;CYP2D6*52.001;CYP2D6*52.002;CYP2D6*54.001;CYP2D6*56.002;CYP2D6*56.003;CYP2D6*72.001;CYP2D6*87.001;CYP2D6*94.001…
chr22_42129770_G_T	1	*35/*68x3	rs28371706,CM960483,COSV62243897	missense_variant	MODERATE		rs28371706	CYP2D6*82;CYP2D6*82.001

## Sheet: Supplementary T9
Supplementary Table 9. Linear regression results assessing CYP2D6 diplotype effects on metoprolol metabolic ratios: Models are additionally adjusted for CYP2D6 inhibitors. The last table represents results with the effect of novel CYP2D6 missense variant chr22:42127887 G>T
CYP2D6 NMa diplotype model (n=108; excluded diplotypes with only one individual)	Estimate	Standar error	P-value	CI 2.5 %	CI 97.5 %
CYP2D6 inhibitors	0.492149	0.20624	0.0189806	0.0879262	0.896373
*2x2/*4	1.52945	0.47041	0.00158517	0.607466	2.45144
*4/[*68 + *4]	7.0487	0.356945	1.40845e-35	6.3491	7.7483
*4/*4	6.70764	0.359376	1.04355e-33	6.00328	7.412
*41/*124	2.70874	0.43325	1.11655e-08	1.85959	3.55789
NMa/[*68 + *4]	1.30433	0.227124	1.09065e-07	0.859176	1.74949
NMa/*3	0.774717	0.356945	0.0324425	0.0751176	1.47432
NMa/*4	1.02871	0.179546	1.15631e-07	0.676805	1.38061
NMa/*41	1.40575	0.356945	0.00015555	0.706148	2.10535
NMa/*5	1.00639	0.207354	4.69311e-06	0.599979	1.41279
NMa/*9	1.75864	0.374625	8.88483e-06	1.02438	2.49289
Contrast	P-value
NMa/[*68 + *4] vs NMa/*4	0.3042
NMa/*41 vs NMa/*4	0.3273
NMa/*9 vs NMa/*4	0.07244
NMa/*9 vs NMa/*41	0.4906
*41/*124 vs NMa/*41	0.01963
*41/*124 vs *4/*4	1.184e-10
NMa/*3 vs NMa/*4	0.5088
CYP2D6 diplotype model (n=98; excluded diplotypes with only one individual)	Estimate	Standar error	P-value	CI 2.5 %	CI 97.5 %
CYP2D6 inhibitors	0.623628	0.239281	0.0109373	0.154646	1.09261
*1/[*68 + *4]	1.36191	0.279967	5.74522e-06	0.813189	1.91064
*1/*2	0.316467	0.229252	0.171347	-0.132859	0.765792
*1/*33	0.217506	0.332142	0.514461	-0.43348	0.868491
*1/*35	-0.381182	0.259391	0.145661	-0.88958	0.127215
*1/*4	1.01143	0.229252	3.20557e-05	0.562102	1.46075
*1/*41	1.73925	0.454013	0.000254755	0.849398	2.6291
*1/*5	1.17136	0.263167	2.77202e-05	0.65556	1.68715
*1/*9	1.84098	0.464974	0.000163384	0.929648	2.75231
*2/*2	0.14889	0.377167	0.694084	-0.590343	0.888123
*2/*33	-0.499468	0.454013	0.274621	-1.38932	0.390381
*2/*35	-0.227936	0.454013	0.617031	-1.11779	0.661913
*2/*5	0.600445	0.454013	0.189808	-0.289404	1.49029
*2x2/*4	1.41352	0.504877	0.00642581	0.423984	2.40307
*4/[*68 + *4]	7.06425	0.377167	8.64394e-31	6.32502	7.80348
*4/*35	0.989953	0.377167	0.0104077	0.25072	1.72919
*4/*4	6.67937	0.381823	6.76153e-29	5.93101	7.42773
*41/*124	2.72429	0.454013	5.63273e-08	1.83444	3.61414
CYP2D6 diplotype model with missense variant added to the model (n=98; excluded diplotypes with only one individual)	Estimate	Standar error	P-value	CI 2.5 %	CI 97.5 %
Novel missense chr22:42127887 G>T	0.527782	0.454316	0.248897	-0.36266	1.41823
CYP2D6 inhibitors	0.635309	0.238965	0.00951744	0.166947	1.10367
*1/[*68 + *4]	1.40187	0.281459	3.7173e-06	0.850224	1.95352
*1/*2	0.355259	0.231171	0.128394	-0.0978276	0.808346
*1/*33	0.257466	0.333189	0.442017	-0.395573	0.910505
*1/*35	-0.345603	0.260625	0.188692	-0.856418	0.165213
*1/*4	1.05022	0.231171	1.99234e-05	0.597133	1.50331
*1/*41	1.77921	0.454316	0.00019143	0.888765	2.66965
*1/*5	1.21132	0.26483	1.77399e-05	0.692261	1.73037
*1/*9	1.8751	0.464877	0.000127119	0.963957	2.78624
*2/*2	0.188851	0.377904	0.61867	-0.551827	0.929528
*2/*33	-0.459508	0.454316	0.314939	-1.34995	0.430935
*2/*35	-0.187976	0.454316	0.680188	-1.07842	0.702467
*2/*5	0.640405	0.454316	0.162632	-0.250037	1.53085
*2x2/*4	1.4418	0.504352	0.00545311	0.453293	2.43031
*4/[*68 + *4]	7.10421	0.377904	1.06634e-30	6.36353	7.84489
*4/*35	1.02991	0.377904	0.00792749	0.289236	1.77059
*4/*4	6.71543	0.382244	7.73294e-29	5.96625	7.46462
*41/*124	2.76425	0.454316	4.08676e-08	1.87381	3.65469

[truncated: 2 more sheets: Supplementary T10, Supplementary T11]
